# Supplementary material for: An efficient nickel-catalyzed alkenylation of functionalized benzylic halides with alkenylaluminum reagents
Source: Royal Society of Chemistry journal article supplement (doi:10.1039/c2ob25303h), 2012-01-01

**Electronic Supplementary Information (ESI)**

**An Efficient Nickel-Catalyzed Alkenylation of Functionalized Benzylic Halides with  
Alkenylaluminum Reagents**

Deepak B. Biradar and Han-Mou Gau\*

Department of Chemistry, National Chung Hsing University, Taichung 402, Taiwan

e-mail: [hmgau@dragon.nchu.edu.tw](mailto:hmgau@dragon.nchu.edu.tw)

## Table of Contents

|                                                                                |      |
|--------------------------------------------------------------------------------|------|
| <b><sup>1</sup>H and <sup>13</sup>C NMR Spectra of Coupling Products</b>       | S-3  |
| 1. ( <i>E</i> )-hept-2-enylbenzene ( <b>2a</b> )                               | S-3  |
| 2. ( <i>E</i> )-1-(hept-2-enyl)-2-methylbenzene ( <b>2b</b> )                  | S-5  |
| 3. ( <i>E</i> )-1-(hept-2-enyl)-3-methylbenzene ( <b>2c</b> )                  | S-7  |
| 4. ( <i>E</i> )-1-(hept-2-enyl)-4-methylbenzene ( <b>2d</b> )                  | S-9  |
| 5. ( <i>E</i> )-1-(hept-2-enyl)-3-methoxybenzene ( <b>2e</b> )                 | S-11 |
| 6. ( <i>E</i> )-1-(hept-2-enyl)-4-methoxybenzene ( <b>2f</b> )                 | S-13 |
| 7. ( <i>E</i> )-(4-(hept-2-enyl)phenyl)(methyl)sulfane ( <b>2g</b> )           | S-15 |
| 8. ( <i>E</i> )-1- <i>tert</i> -butyl-4-(hept-2-enyl)benzene ( <b>2h</b> )     | S-17 |
| 9. ( <i>E</i> )-2-(hept-2-enyl)biphenyl ( <b>2i</b> )                          | S-19 |
| 10. ( <i>E</i> )-3-(hept-2-enyl)biphenyl ( <b>2j</b> )                         | S-21 |
| 11. ( <i>E</i> )-1-(hept-2-enyl)-3,5-dimethoxybenzene ( <b>2k</b> )            | S-23 |
| 12. ( <i>E</i> )-1-chloro-4-(hept-2-enyl)benzene ( <b>2l</b> )                 | S-25 |
| 13. ( <i>E</i> )-1-(hept-2-enyl)-3,5-bis(trifluoromethyl)benzene ( <b>2m</b> ) | S-27 |
| 14. ( <i>E</i> )-methyl 4-(hept-2-enyl)benzoate ( <b>2n</b> )                  | S-29 |
| 15. ( <i>E</i> )-1,4-diphenylbut-2-ene ( <b>2o</b> )                           | S-31 |
| 16. ( <i>E</i> )-(3-cyclohexylallyl)benzene ( <b>2p</b> )                      | S-33 |
| 17. ( <i>E</i> )-3-(3-phenylprop-1-enyl)thiophene ( <b>2q</b> )                | S-35 |
| 18. ( <i>E</i> )-1-fluoro-4-(hept-2-enyl)benzene ( <b>2r</b> )                 | S-37 |
| 19. ( <i>E</i> )-1-(hept-2-enyl)-4-vinylbenzene ( <b>2s</b> )                  | S-39 |

## $^1\text{H}$ and $^{13}\text{C}$ NMR Spectra of Coupling Products

### 1. (*E*)-hept-2-enylbenzene (2a)

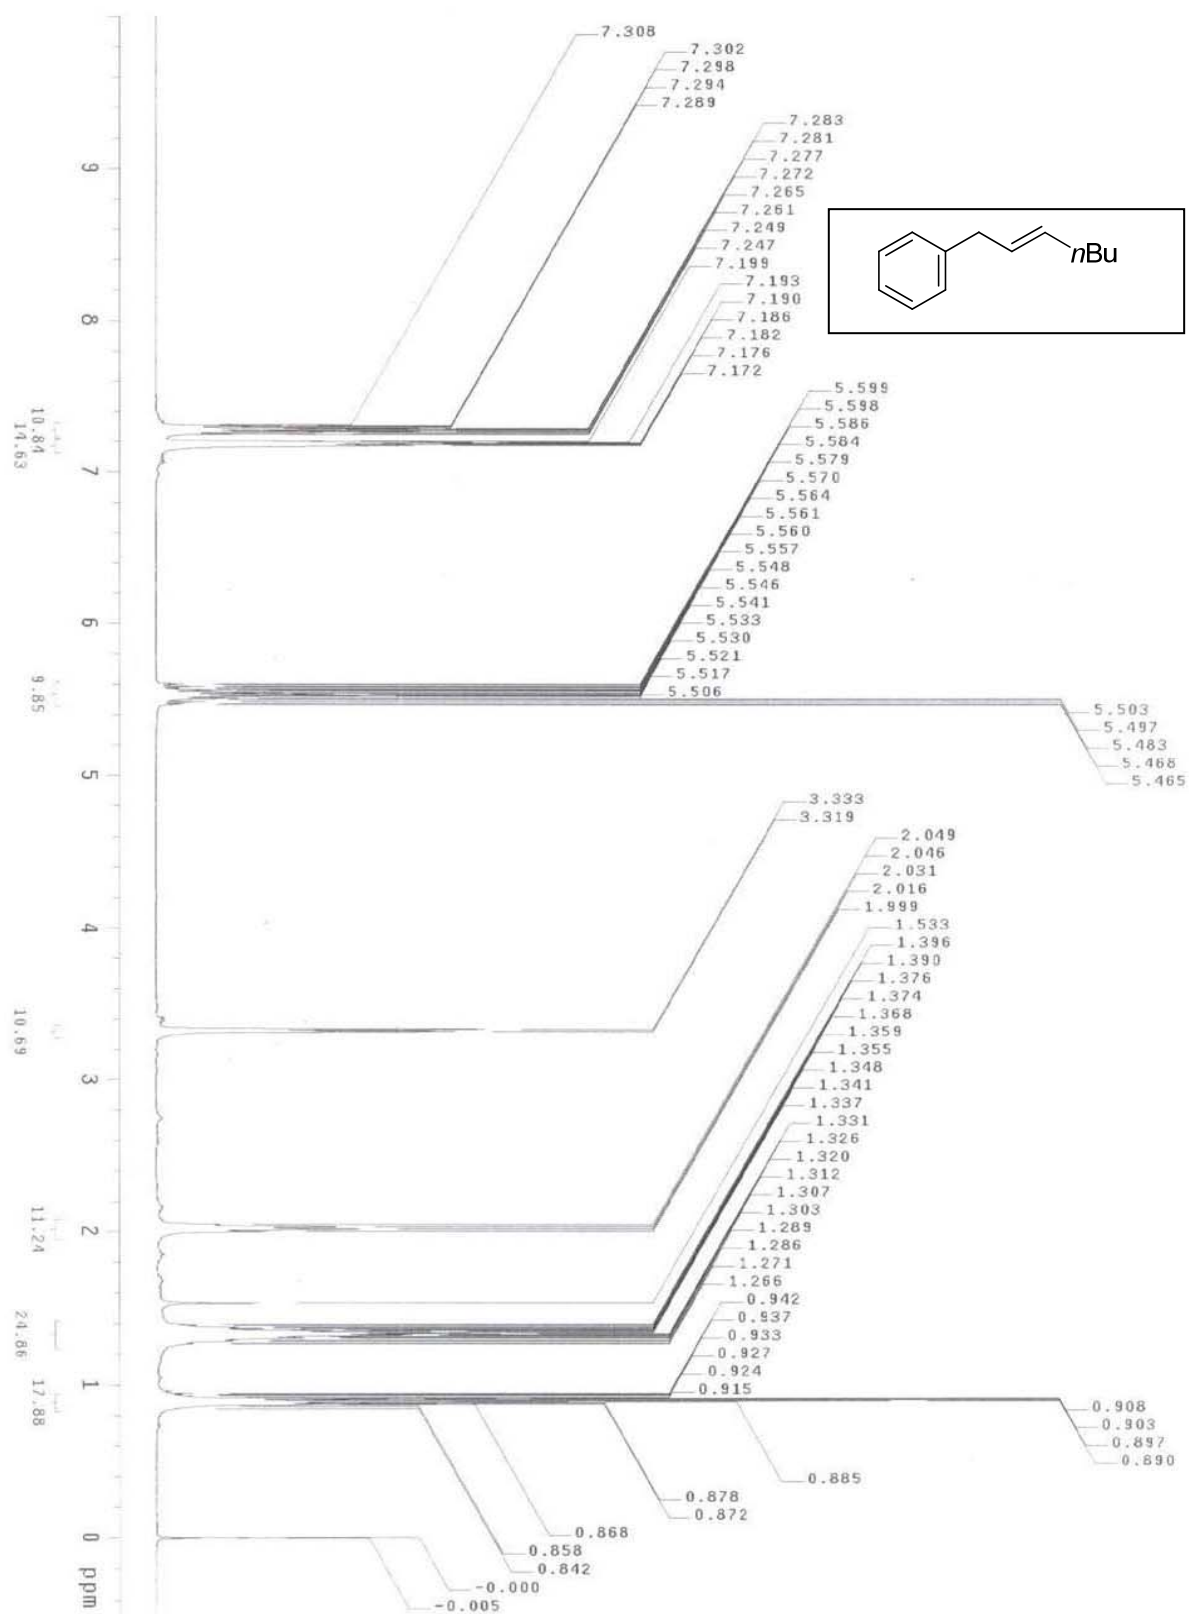

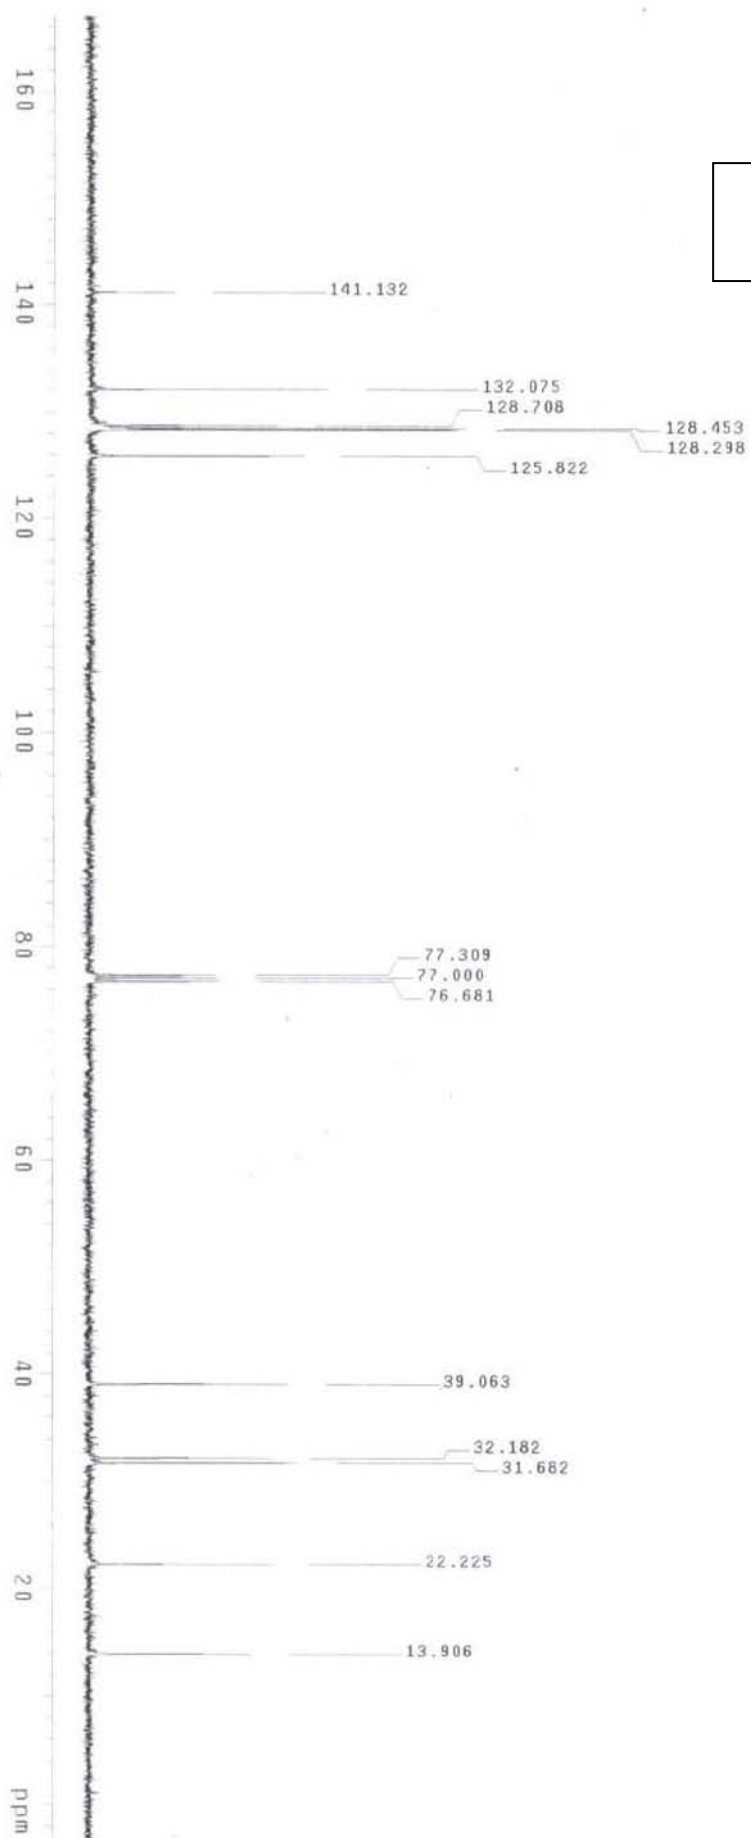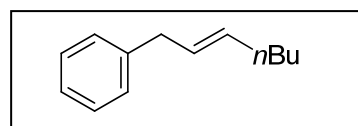

## 2. (E)-1-(hept-2-enyl)-2-methylbenzene (2b)

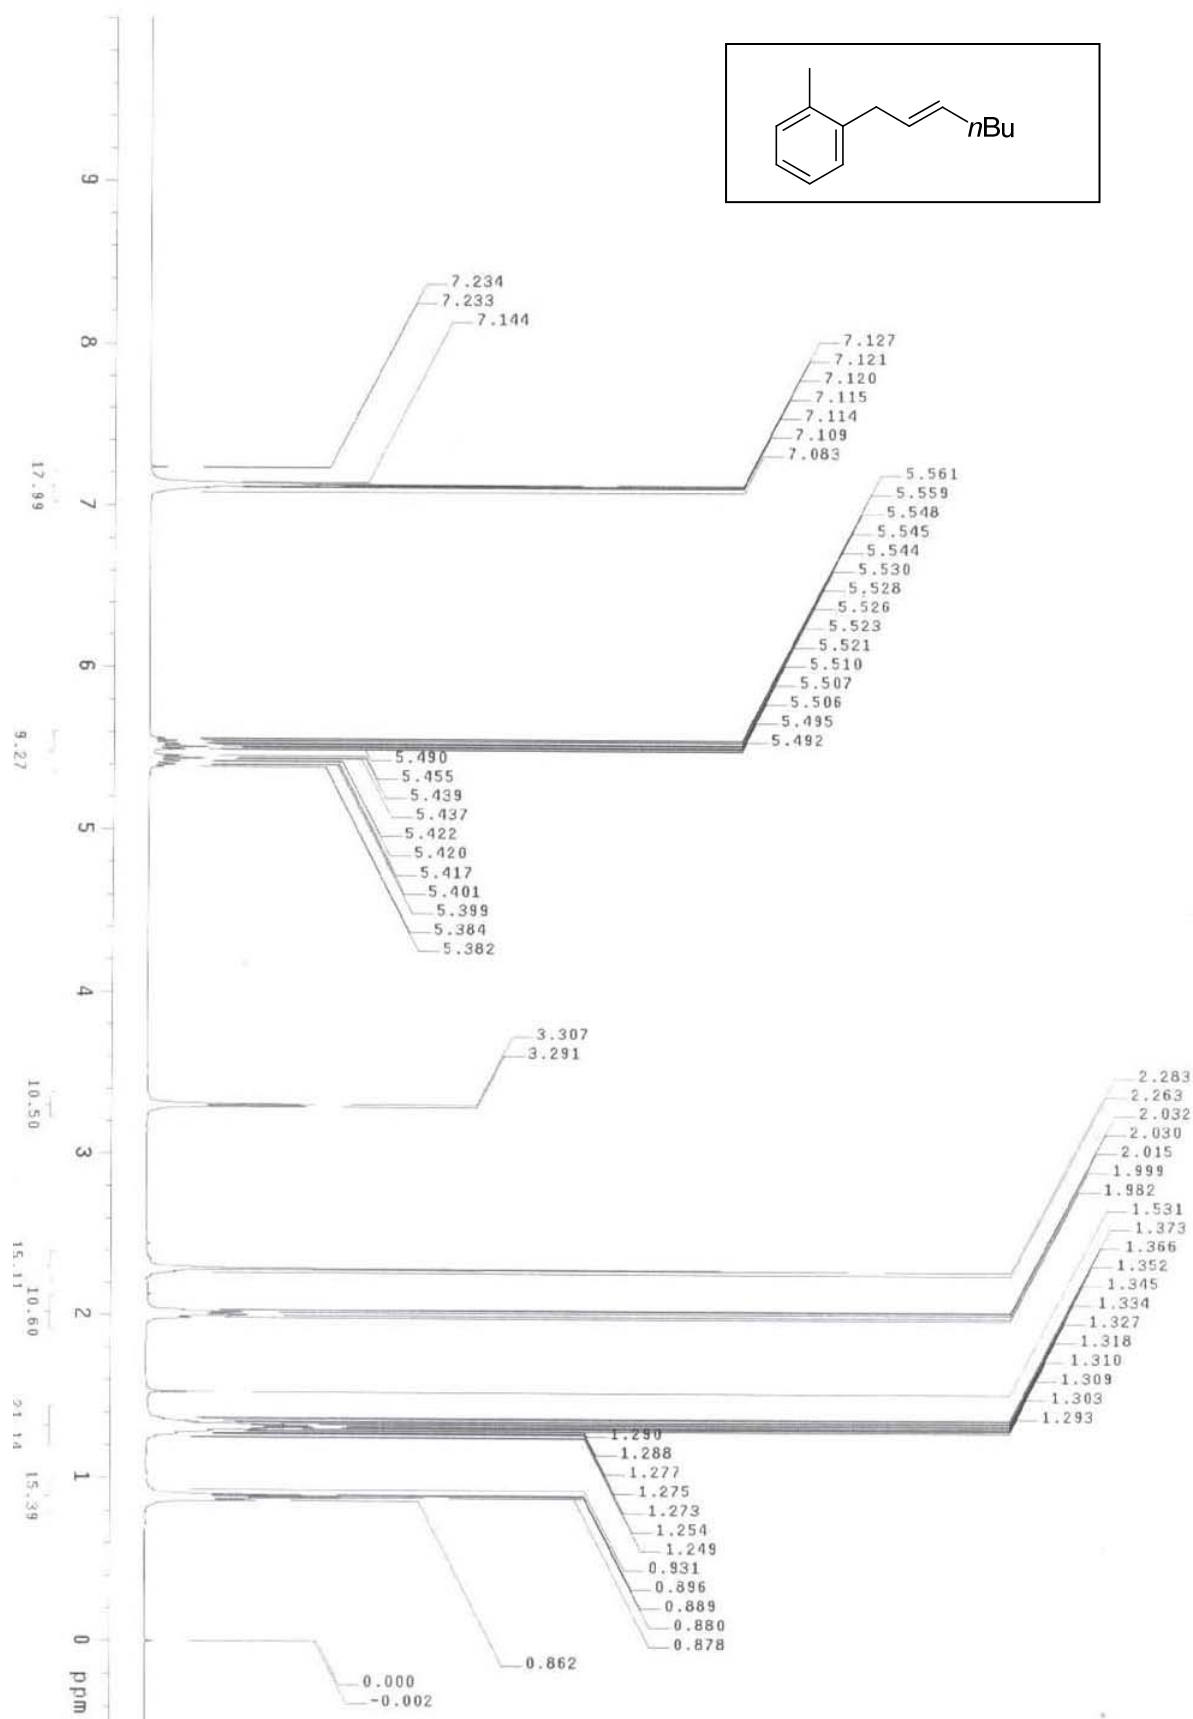

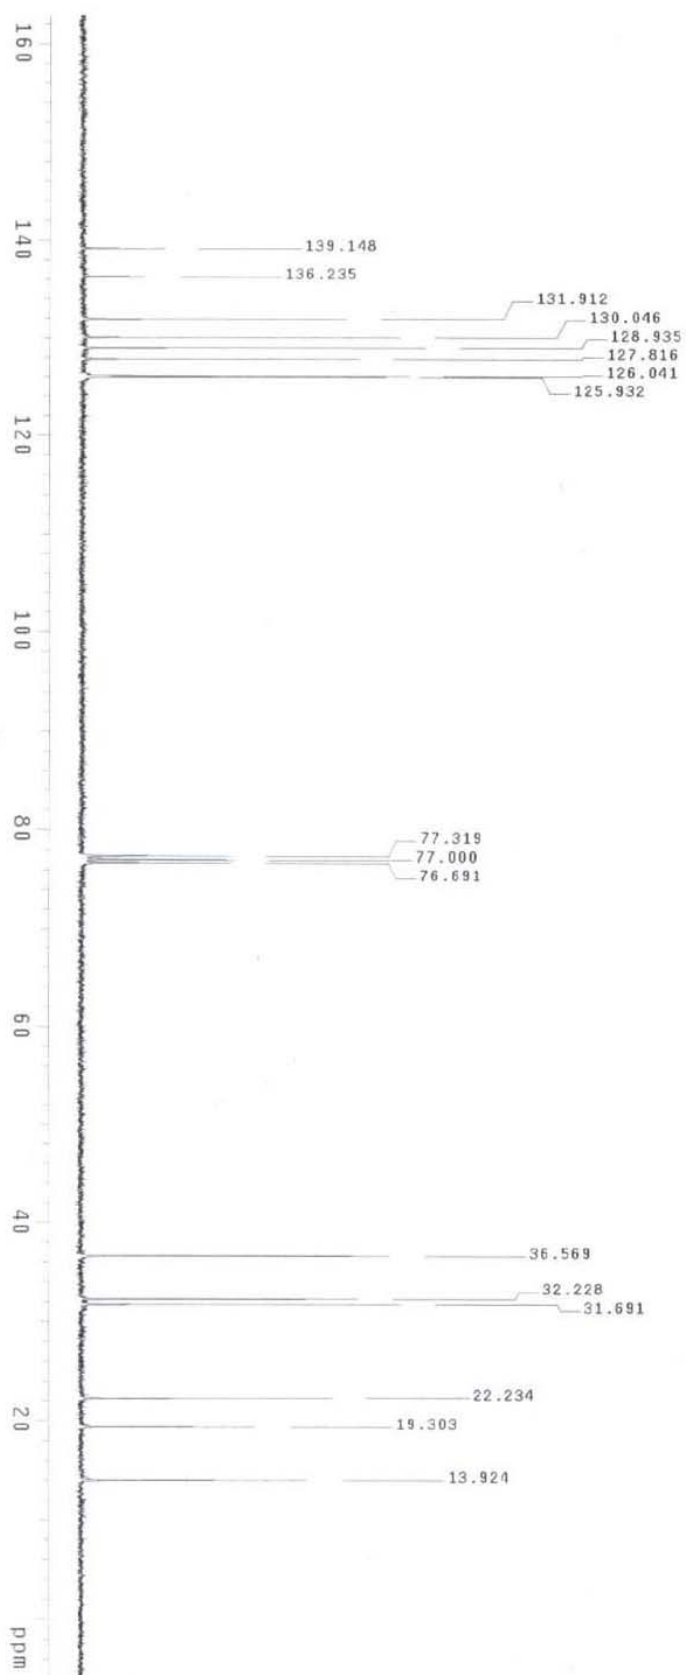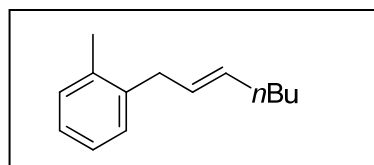

### 3. (E)-1-(hept-2-enyl)-3-methylbenzene (2c)

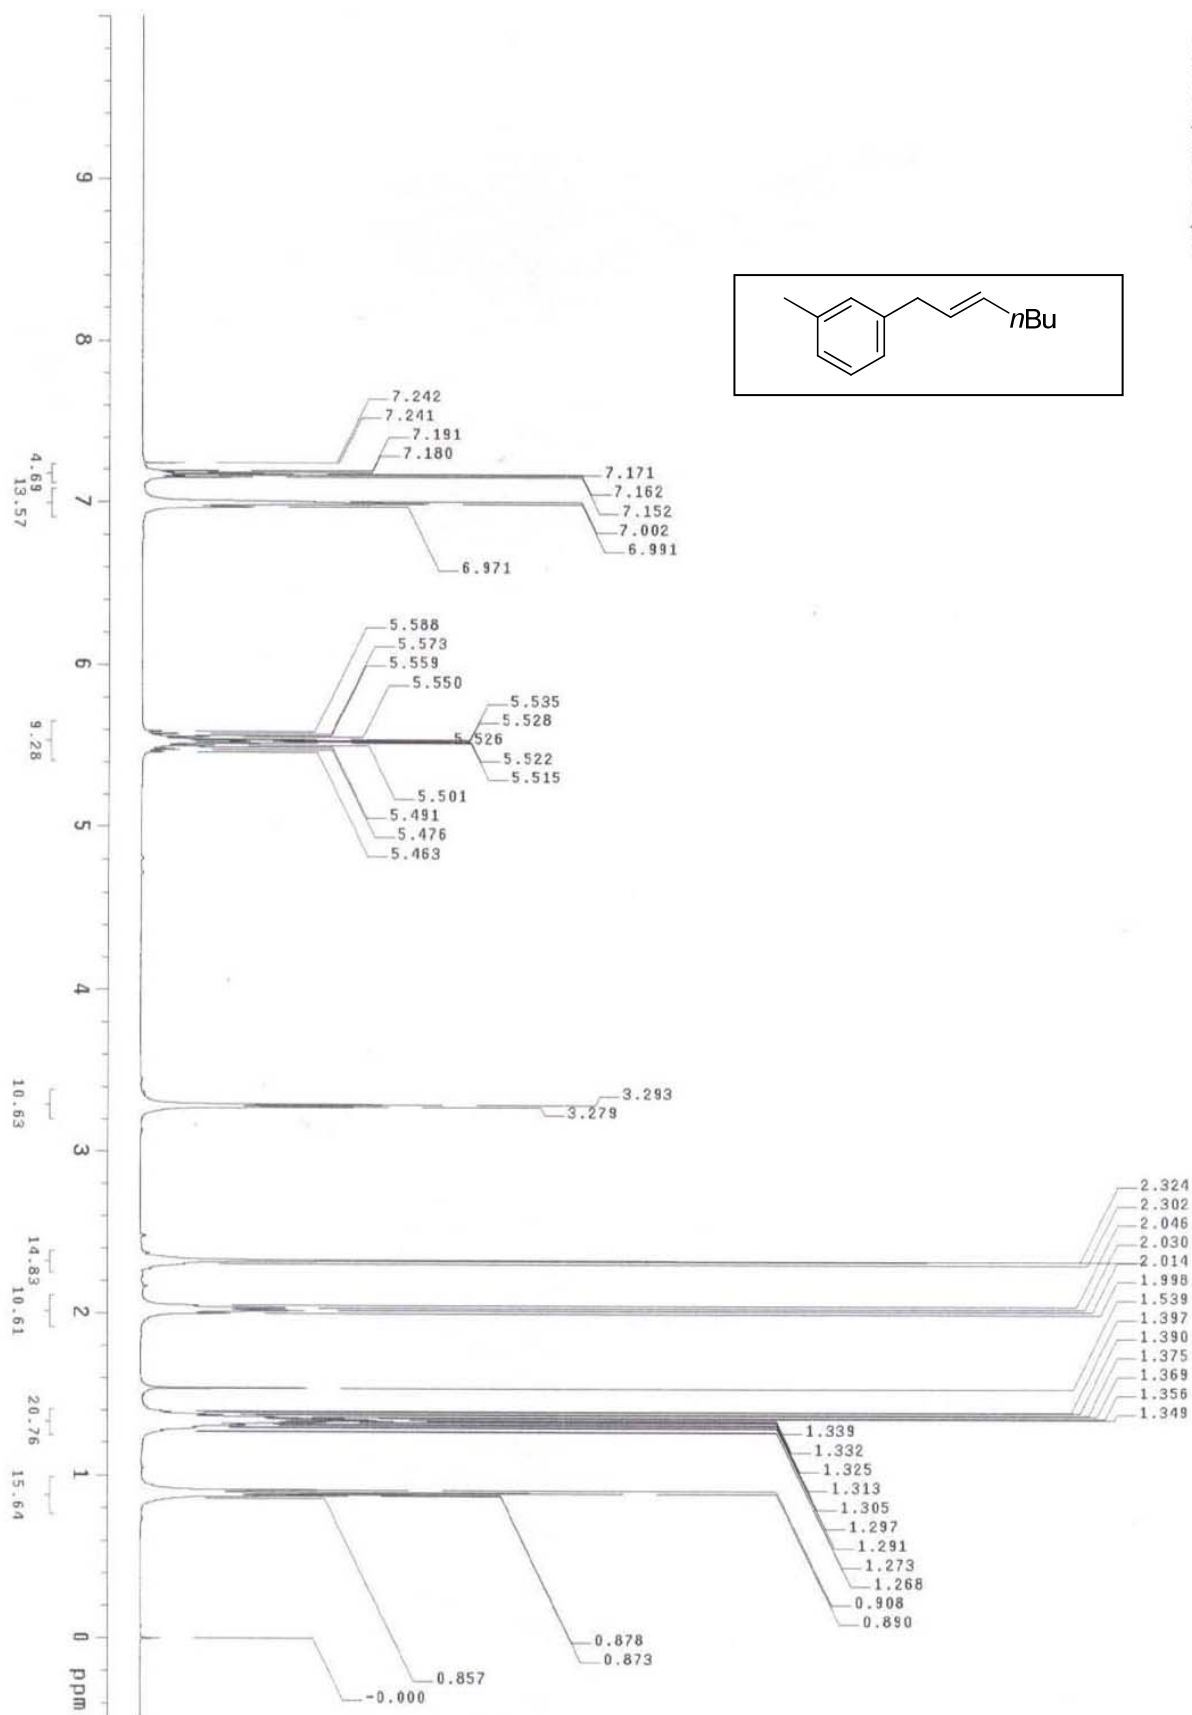

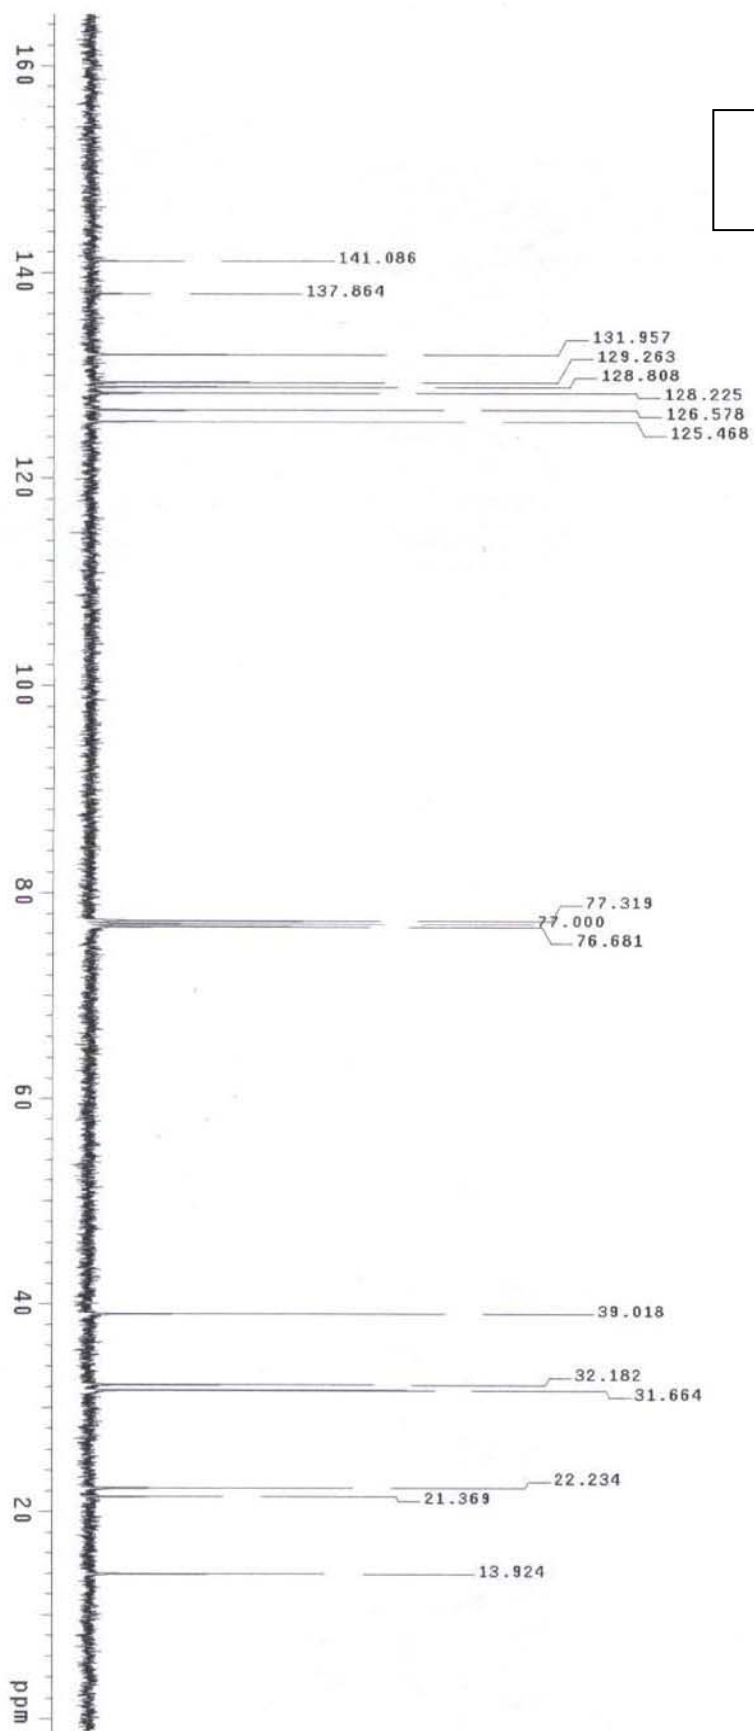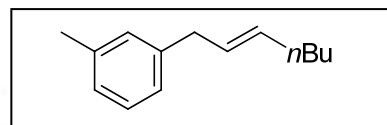



#### 4. (E)-1-(hept-2-enyl)-4-methylbenzene (2d)

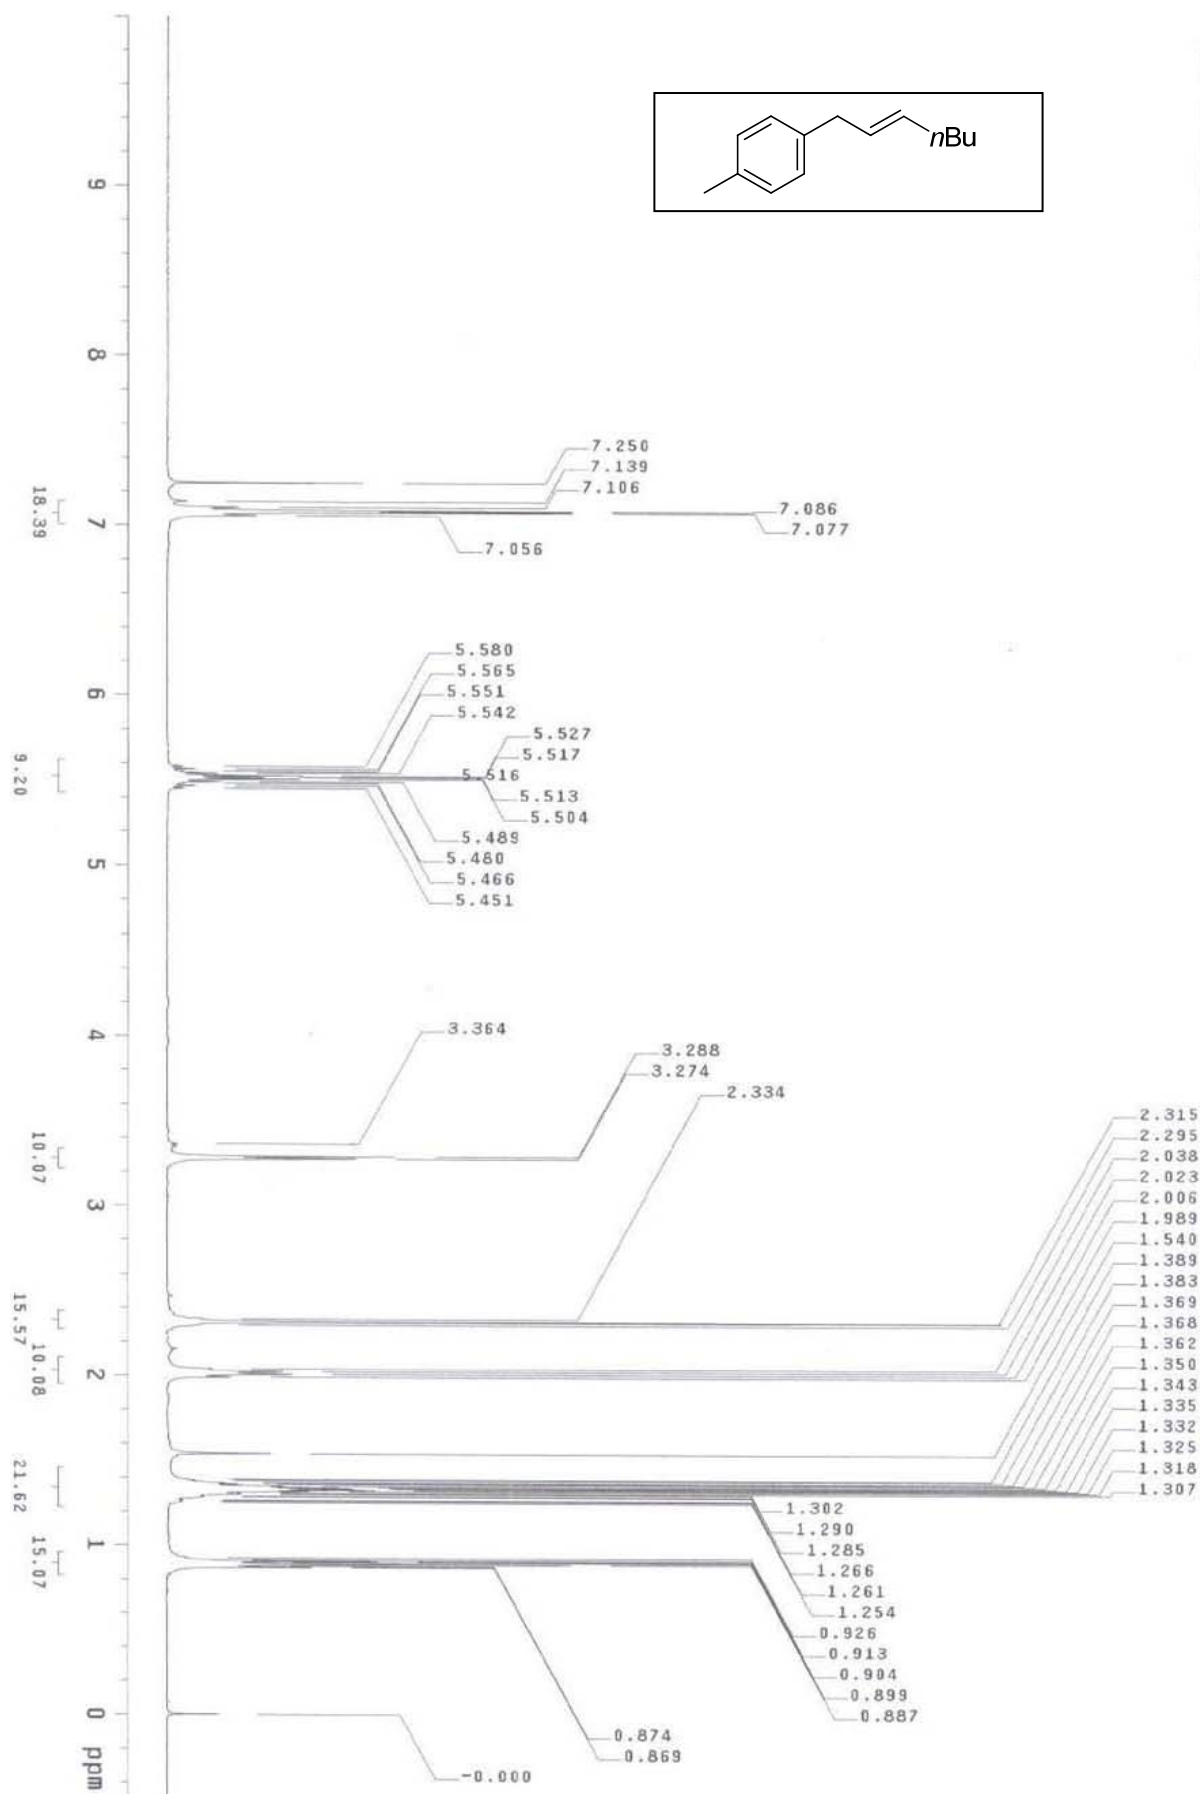

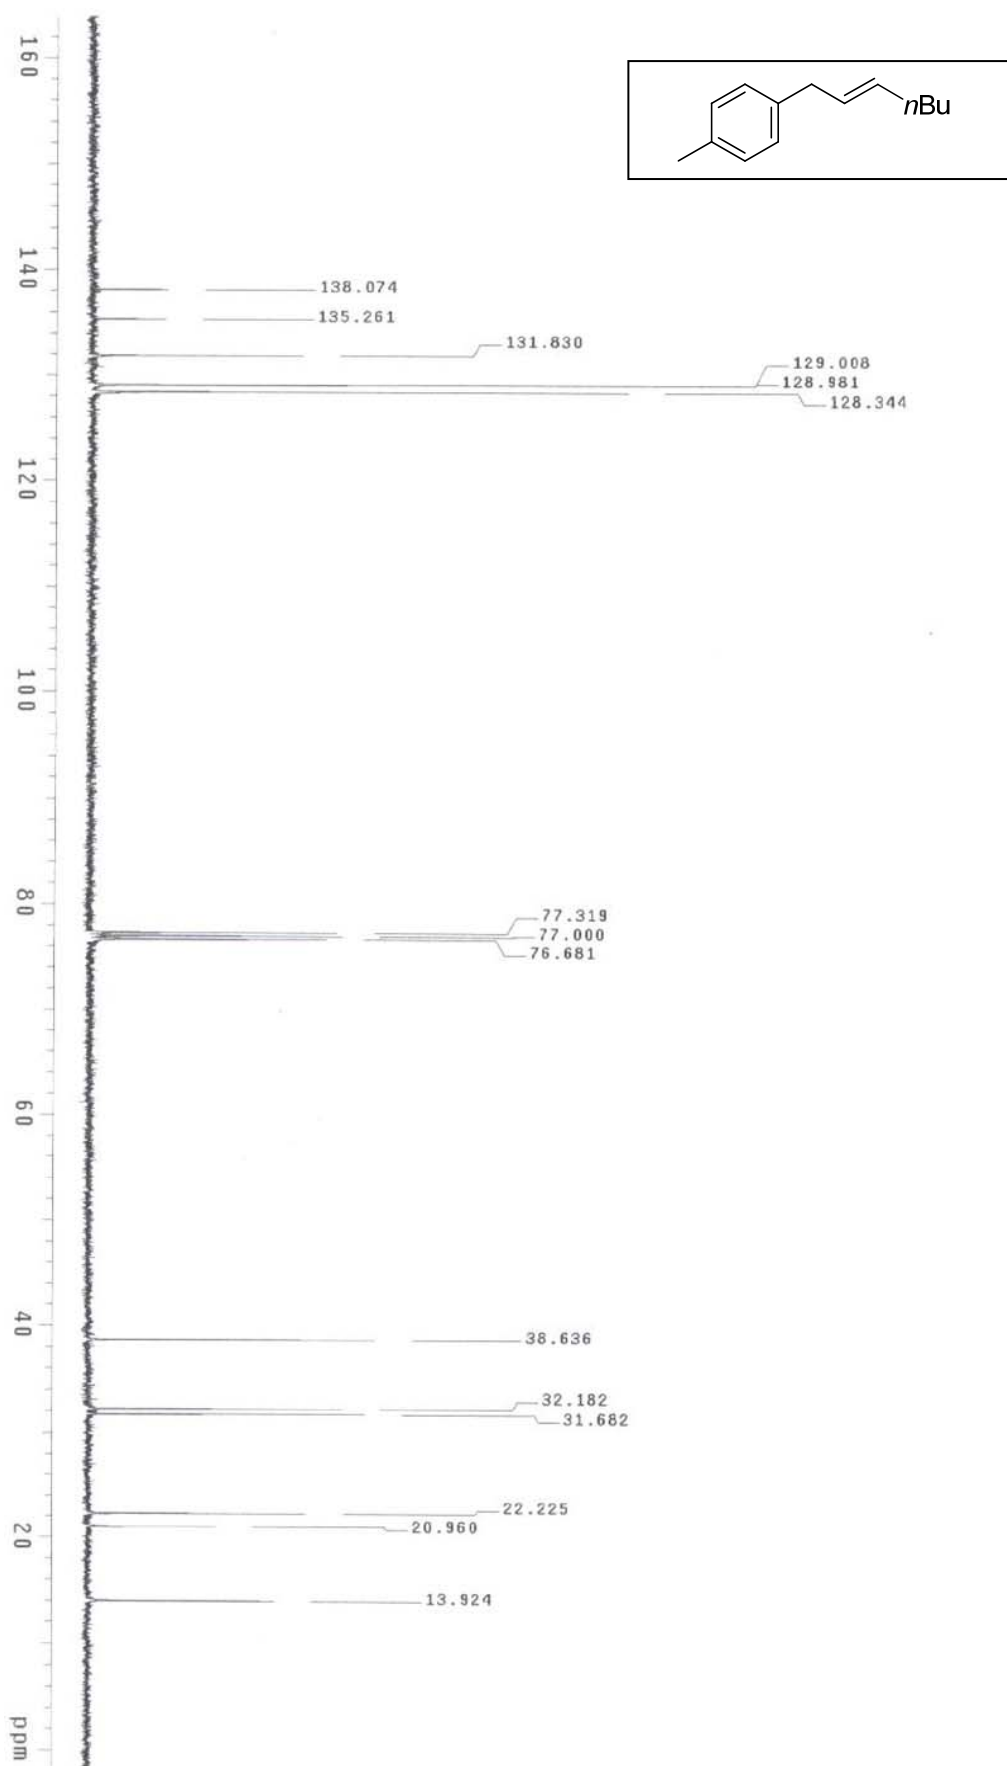

### 5. (*E*)-1-(hept-2-enyl)-3-methoxybenzene (2e)

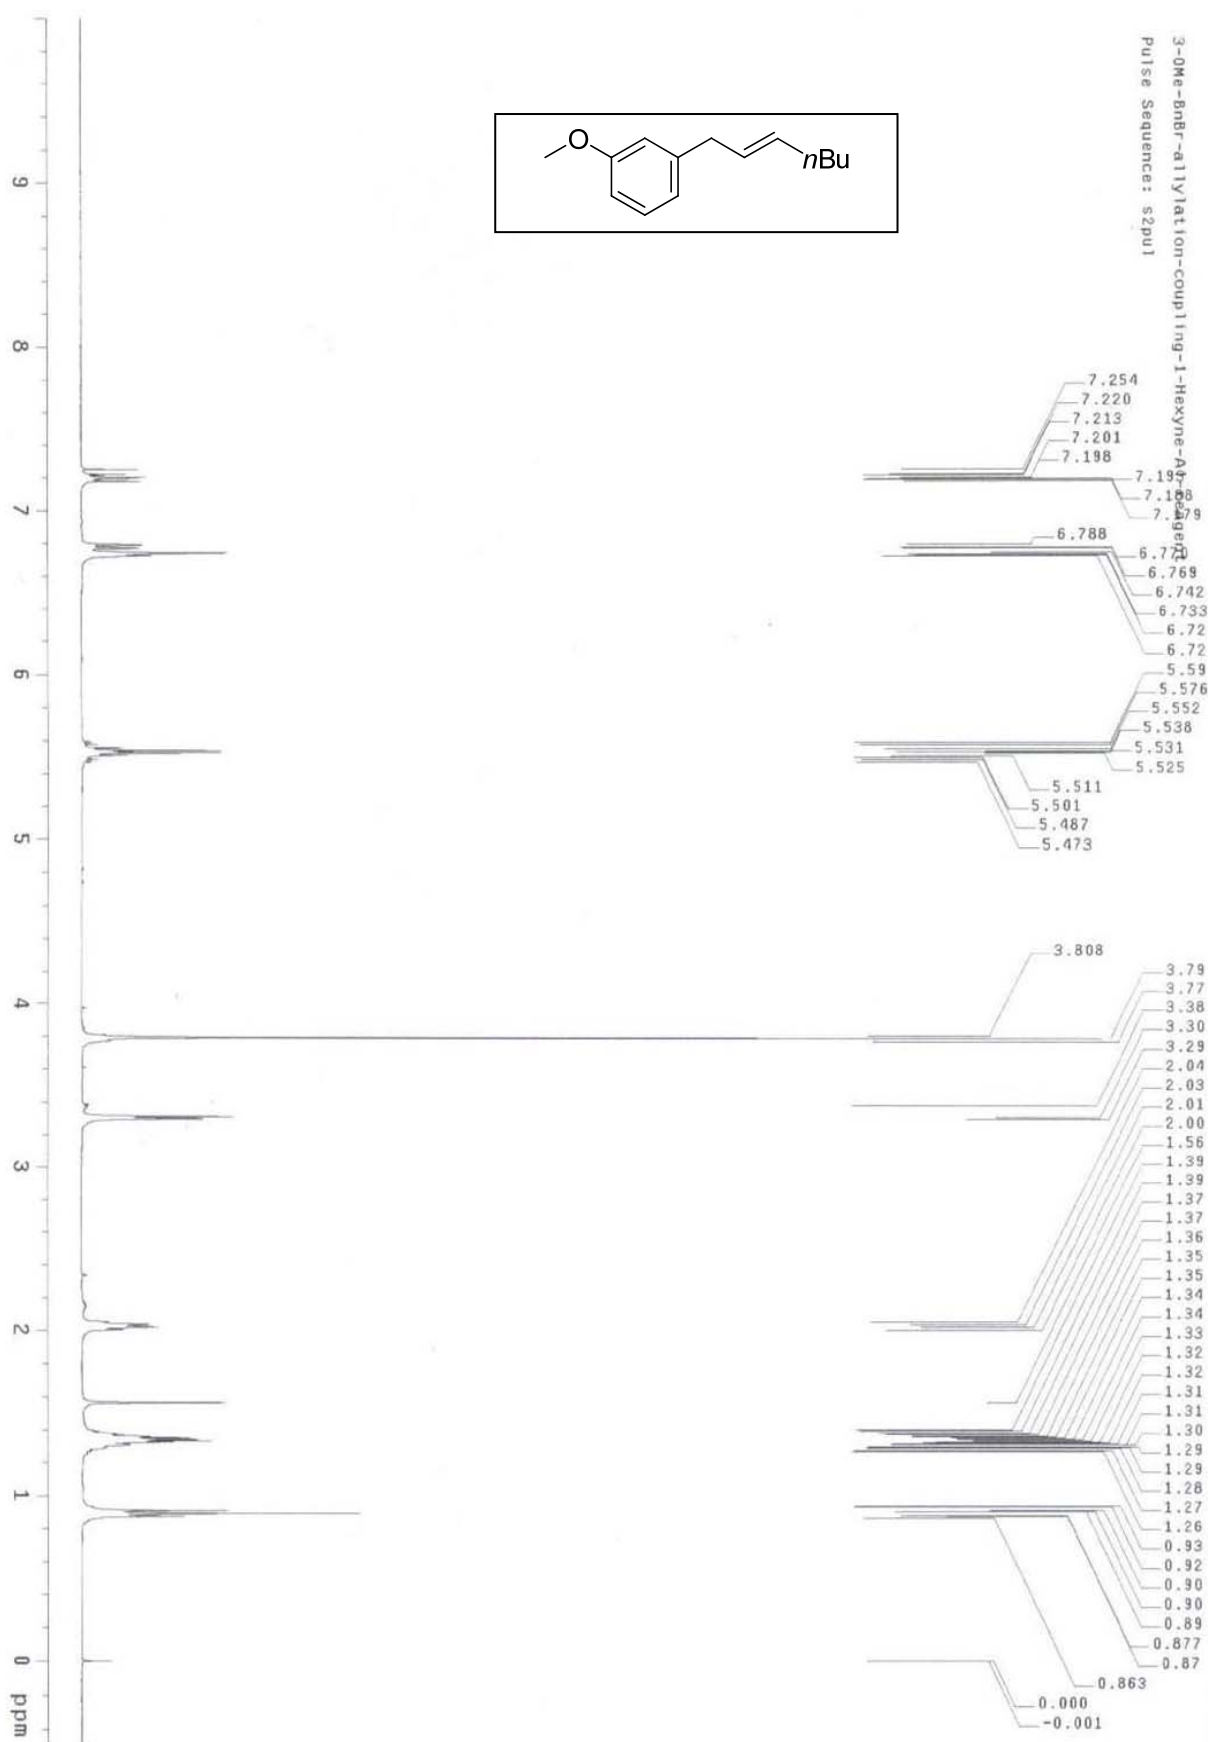

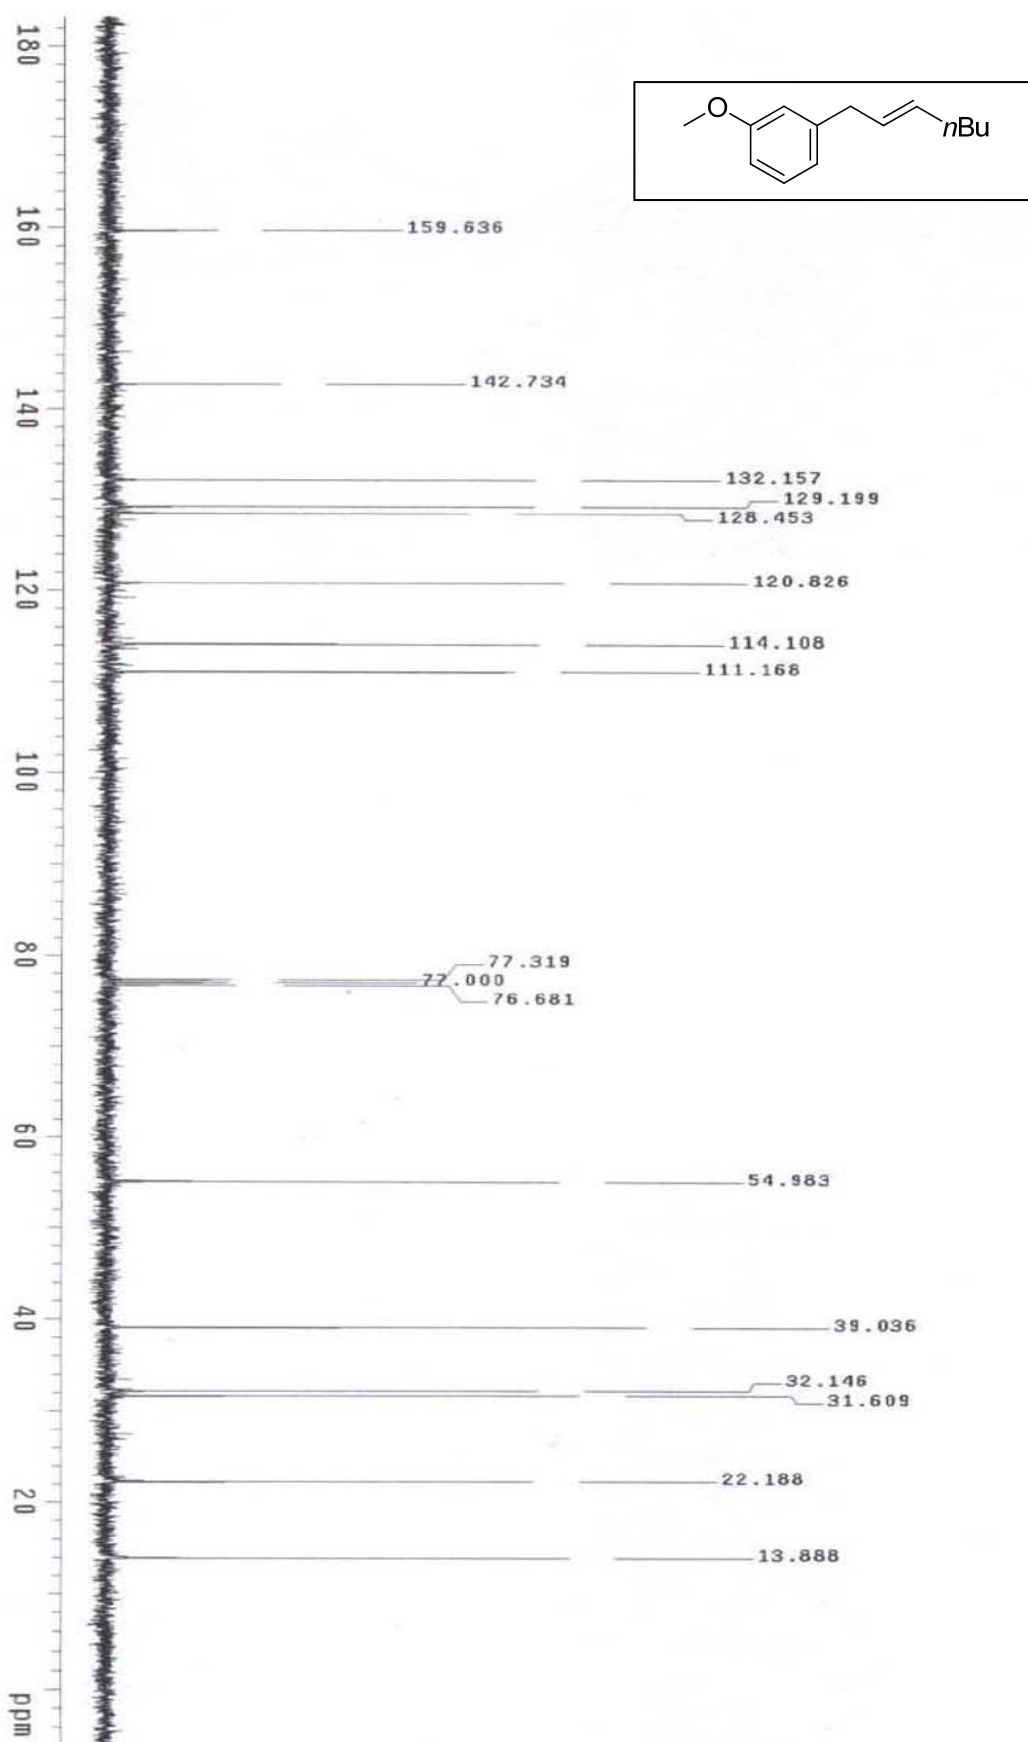

### 6. (E)-1-(hept-2-enyl)-4-methoxybenzene (2f)

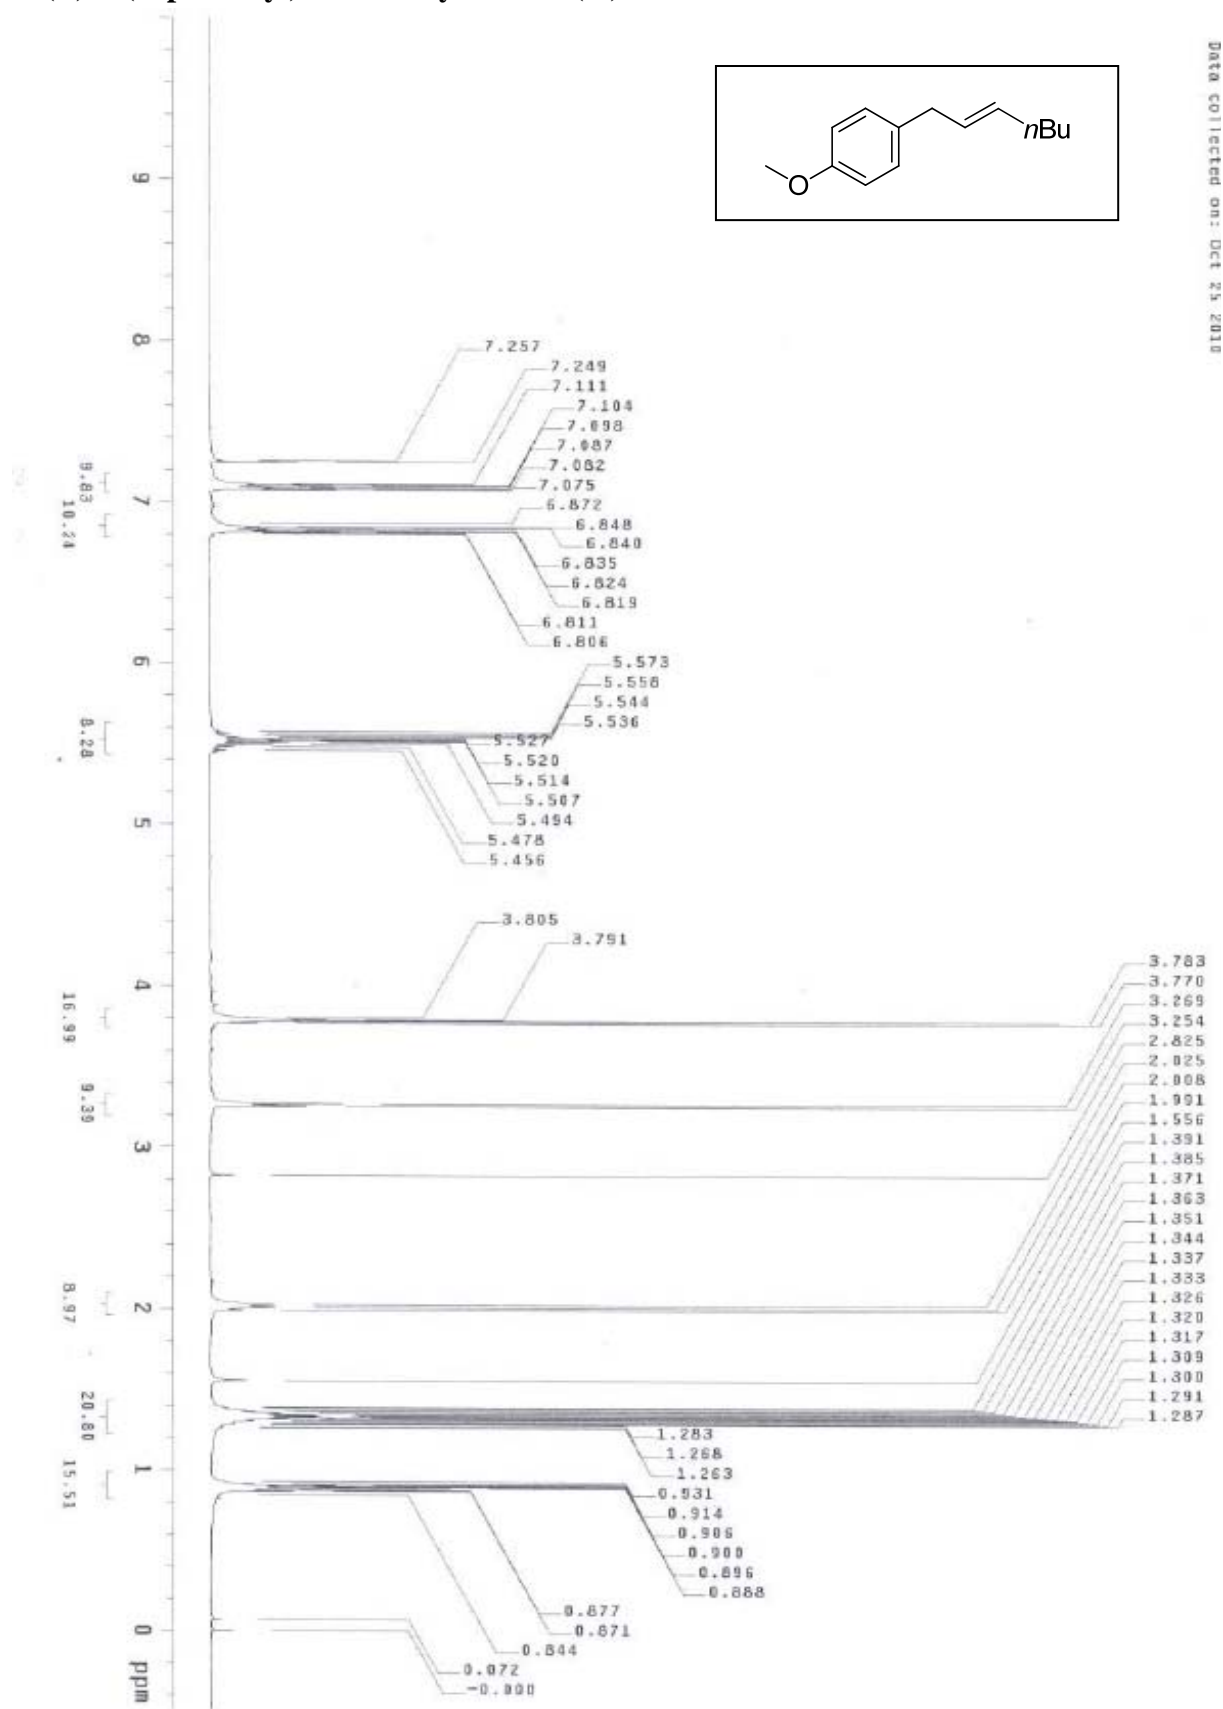

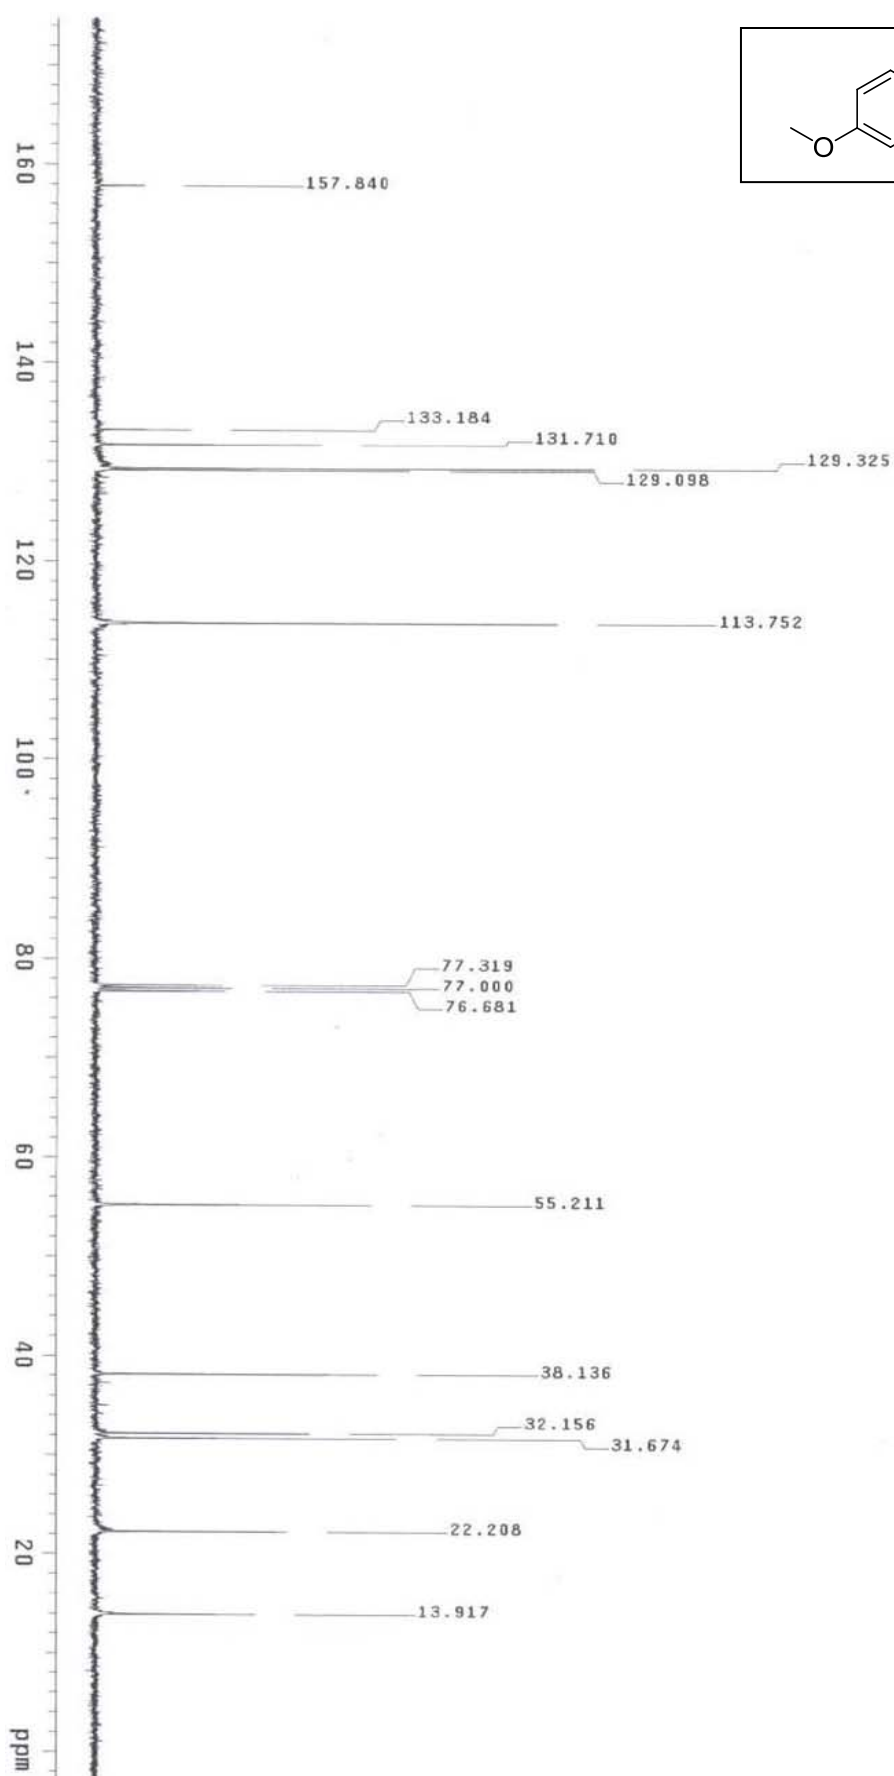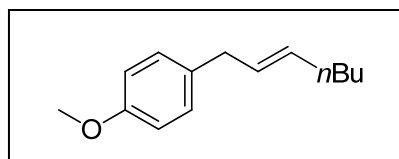

### 7. (E)-4-(hept-2-enyl)phenyl(methyl)sulfane (2g)

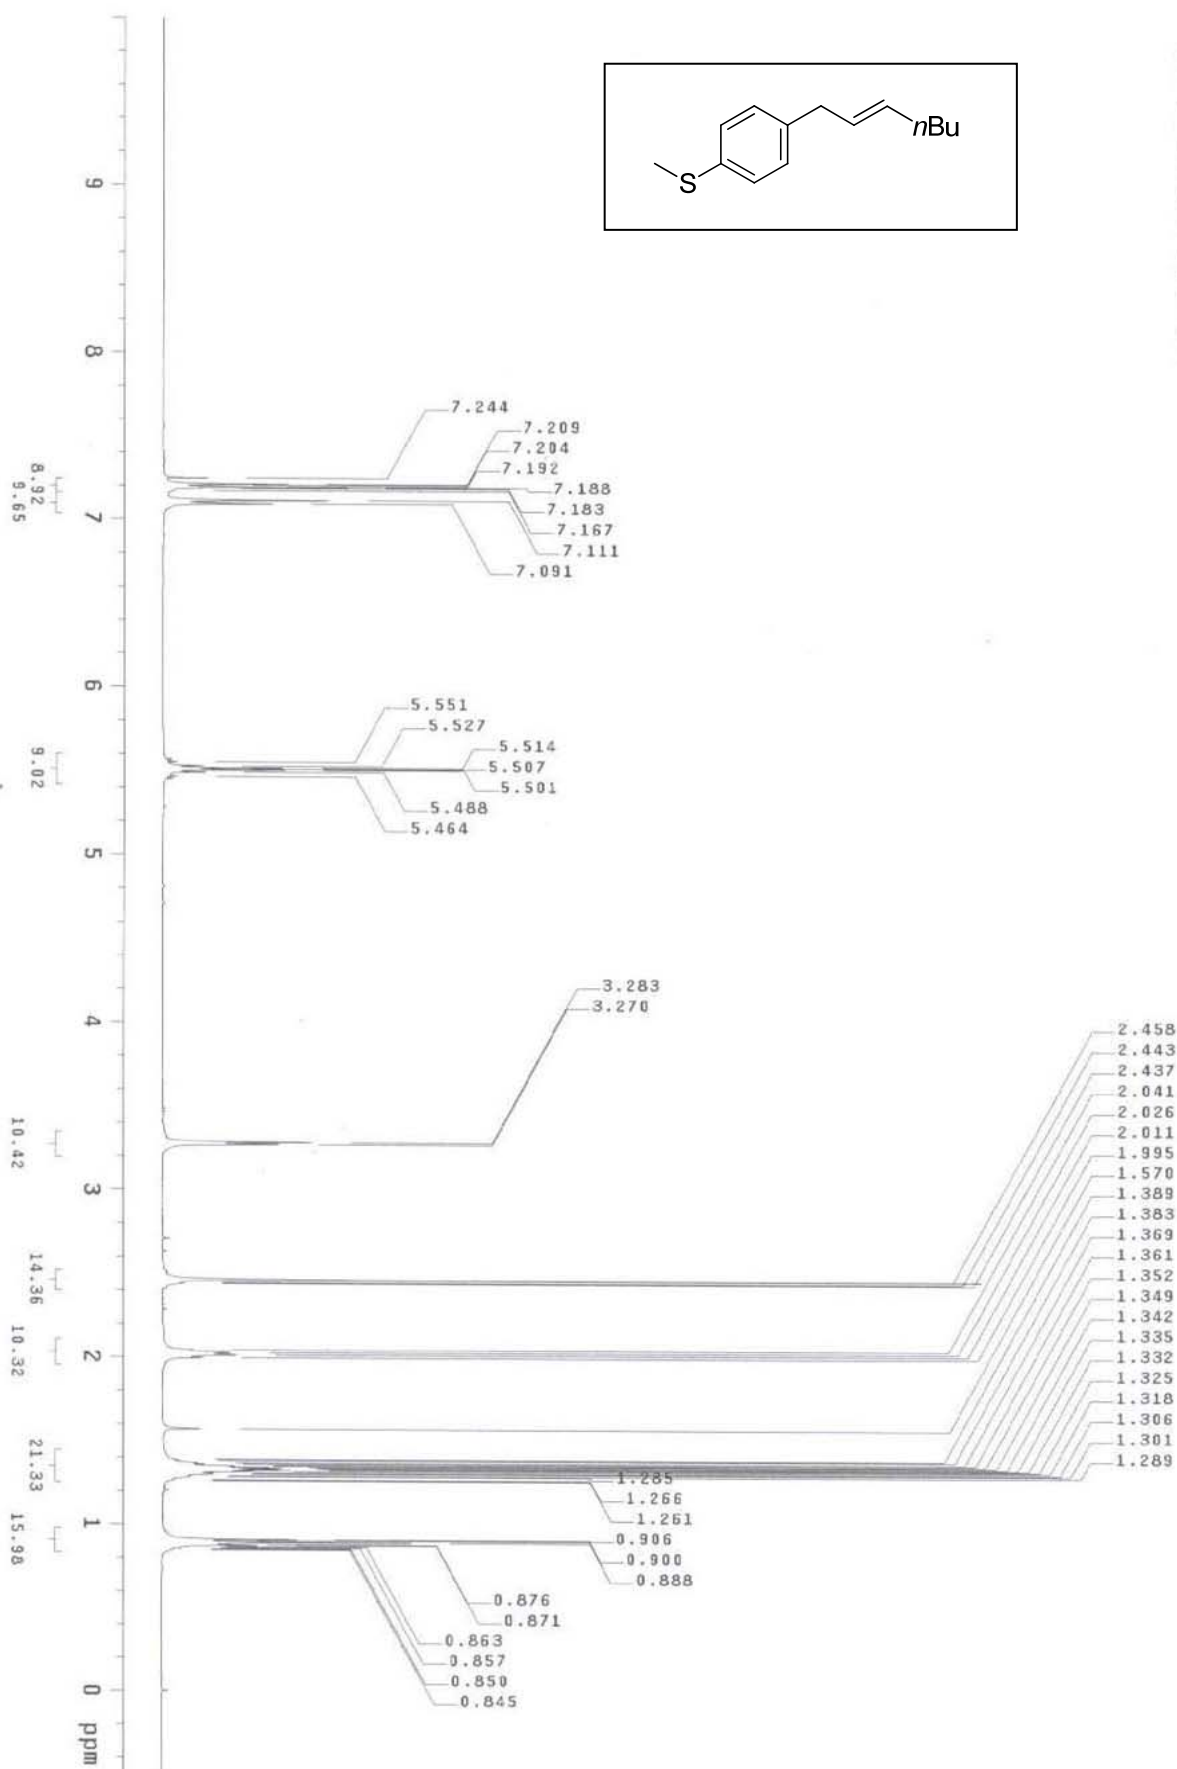

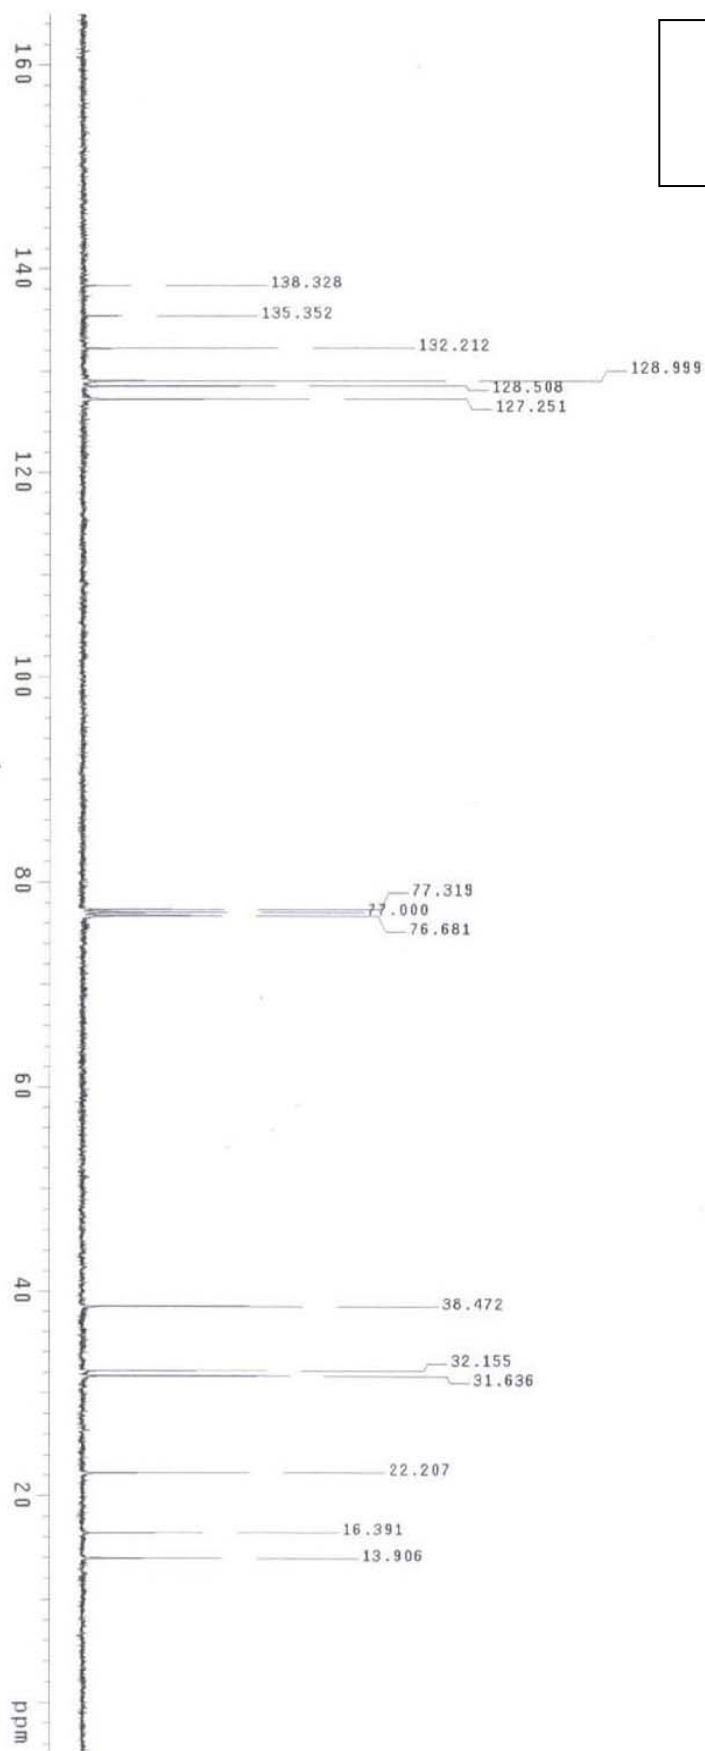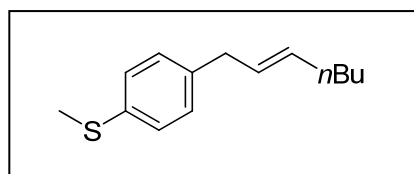



### 8. (E)-1-tert-butyl-4-(hept-2-enyl)benzene (2h)

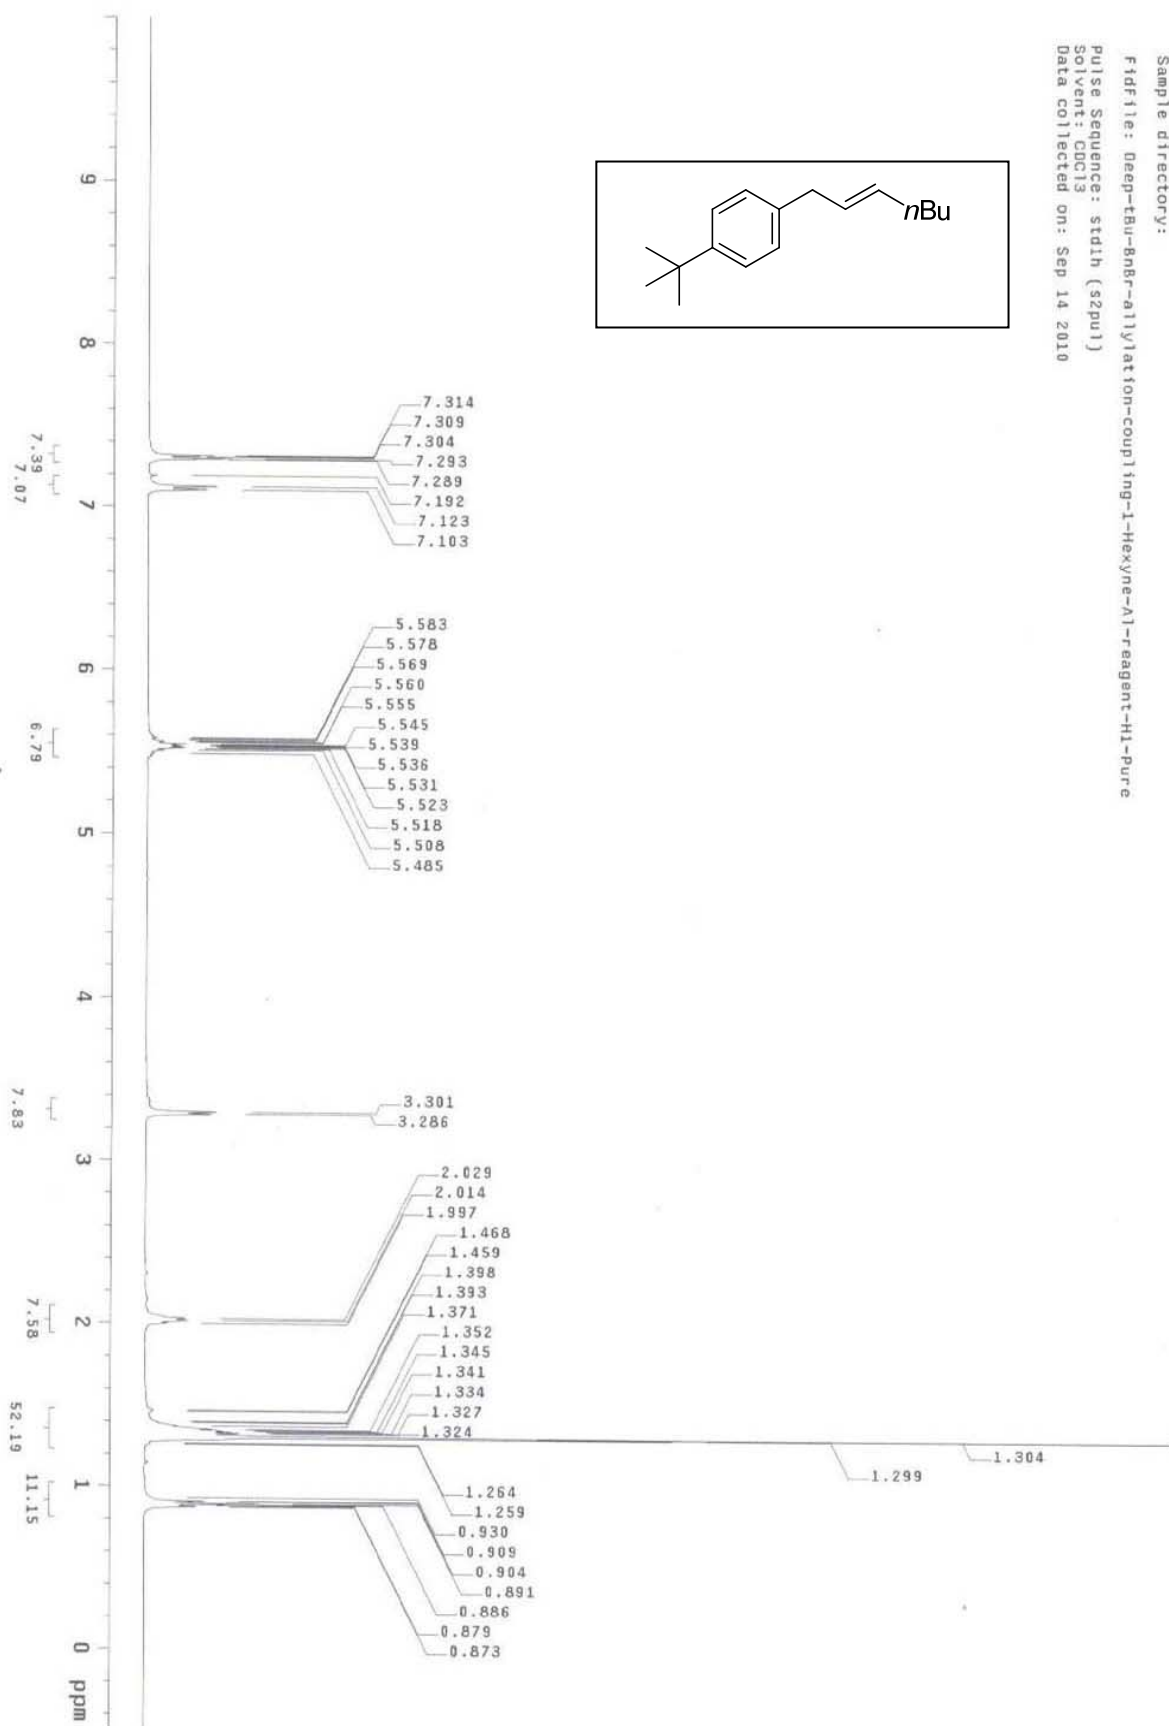

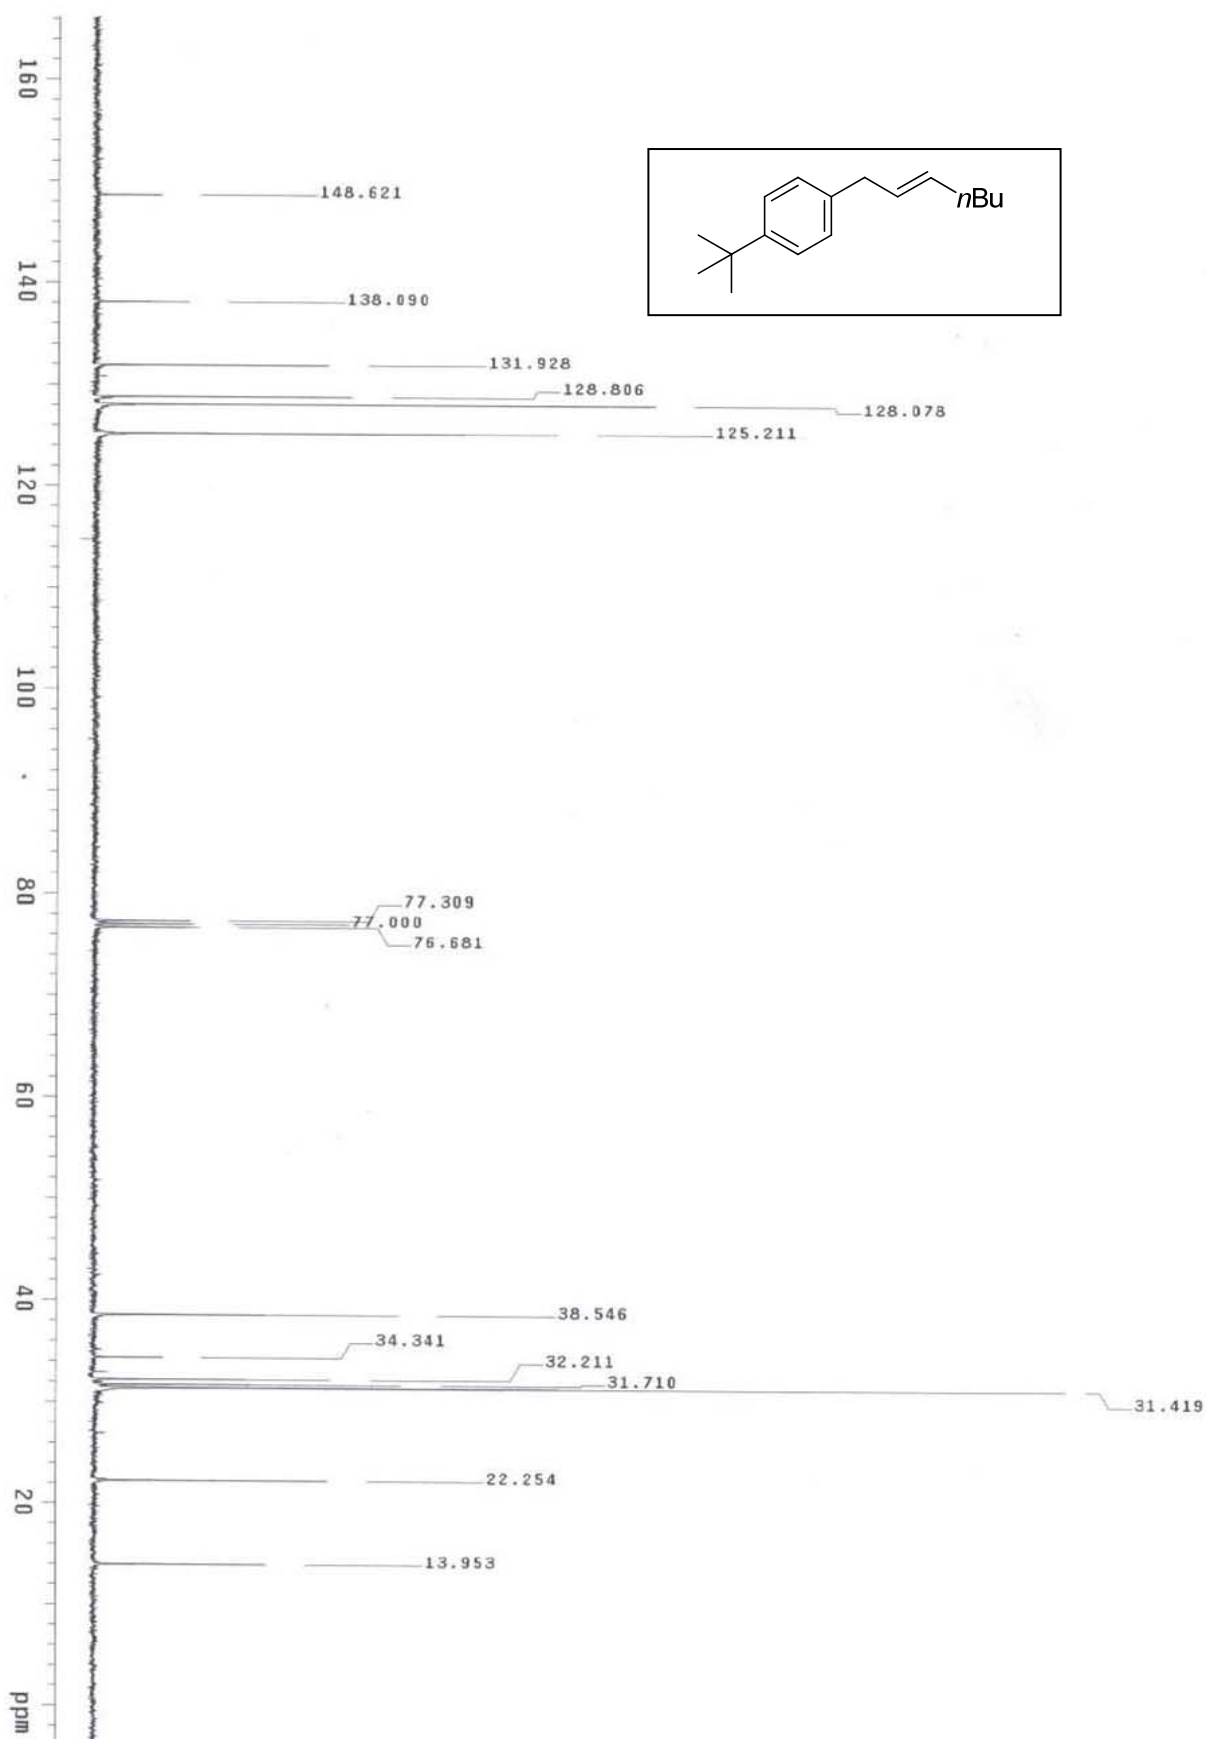

### 9. (E)-2-(hept-2-enyl)biphenyl (2i)

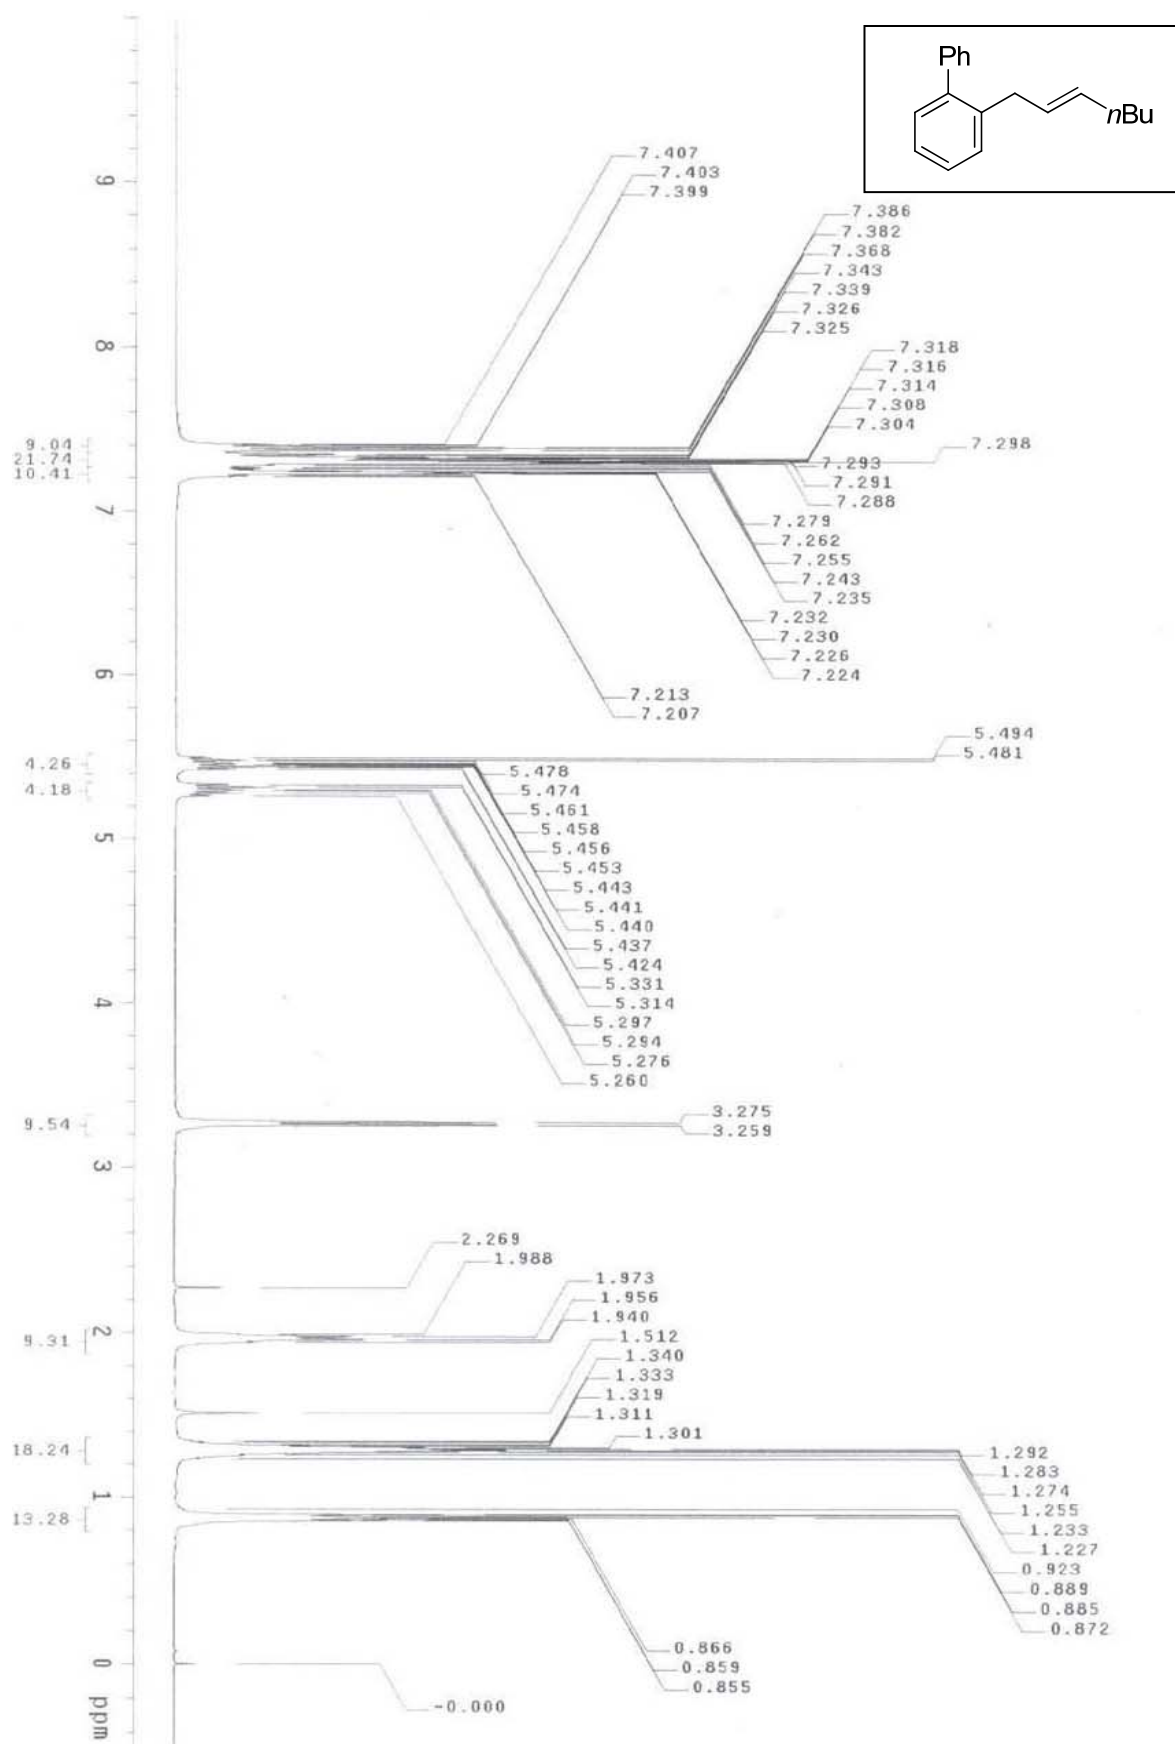

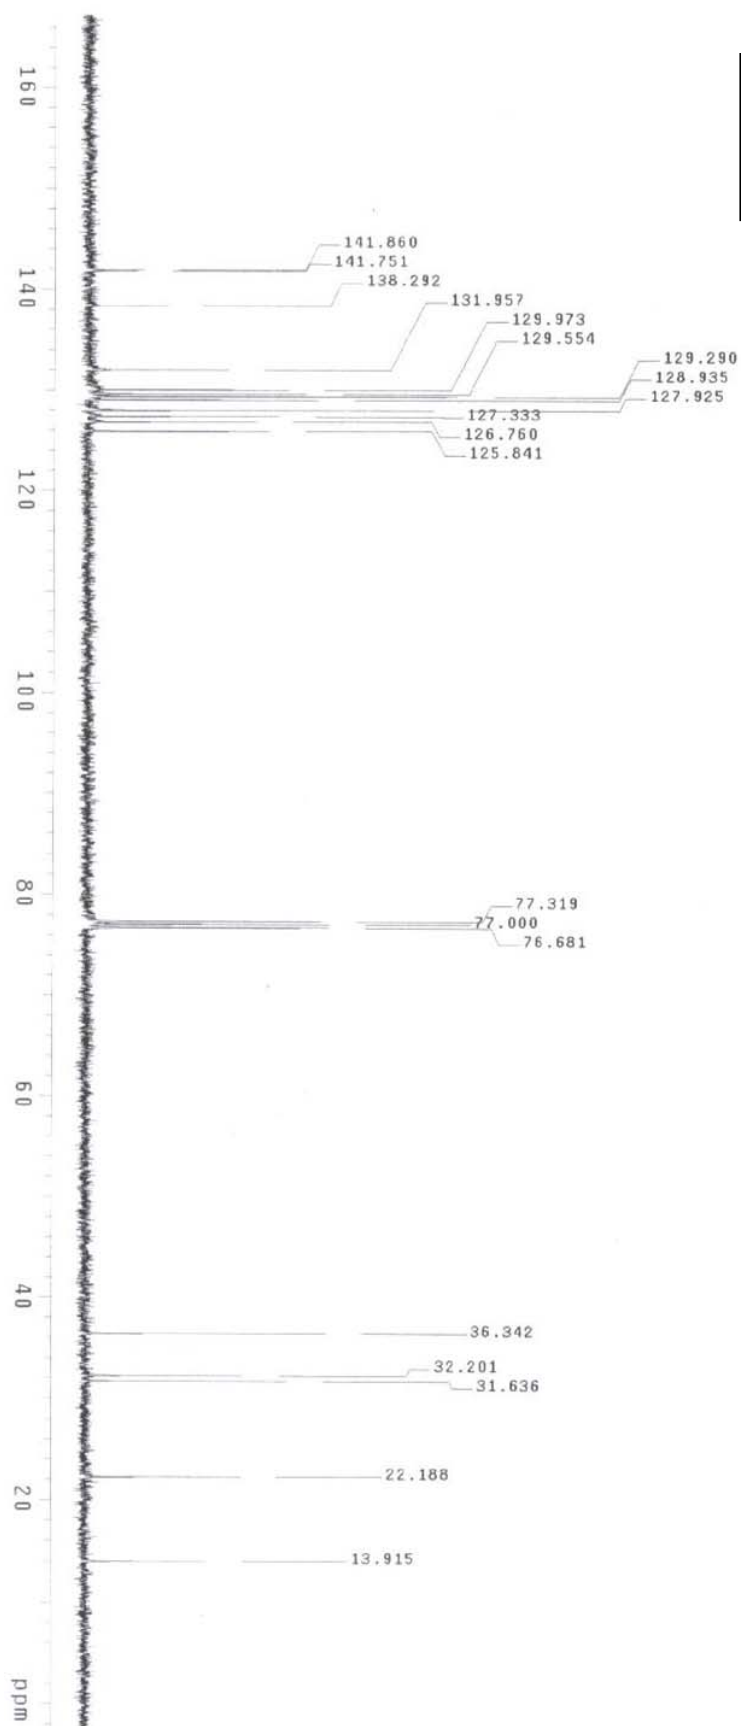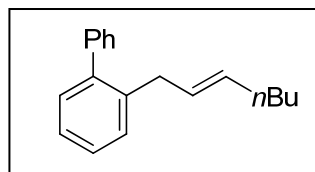

### 10. (*E*)-3-(hept-2-enyl)biphenyl (2j)

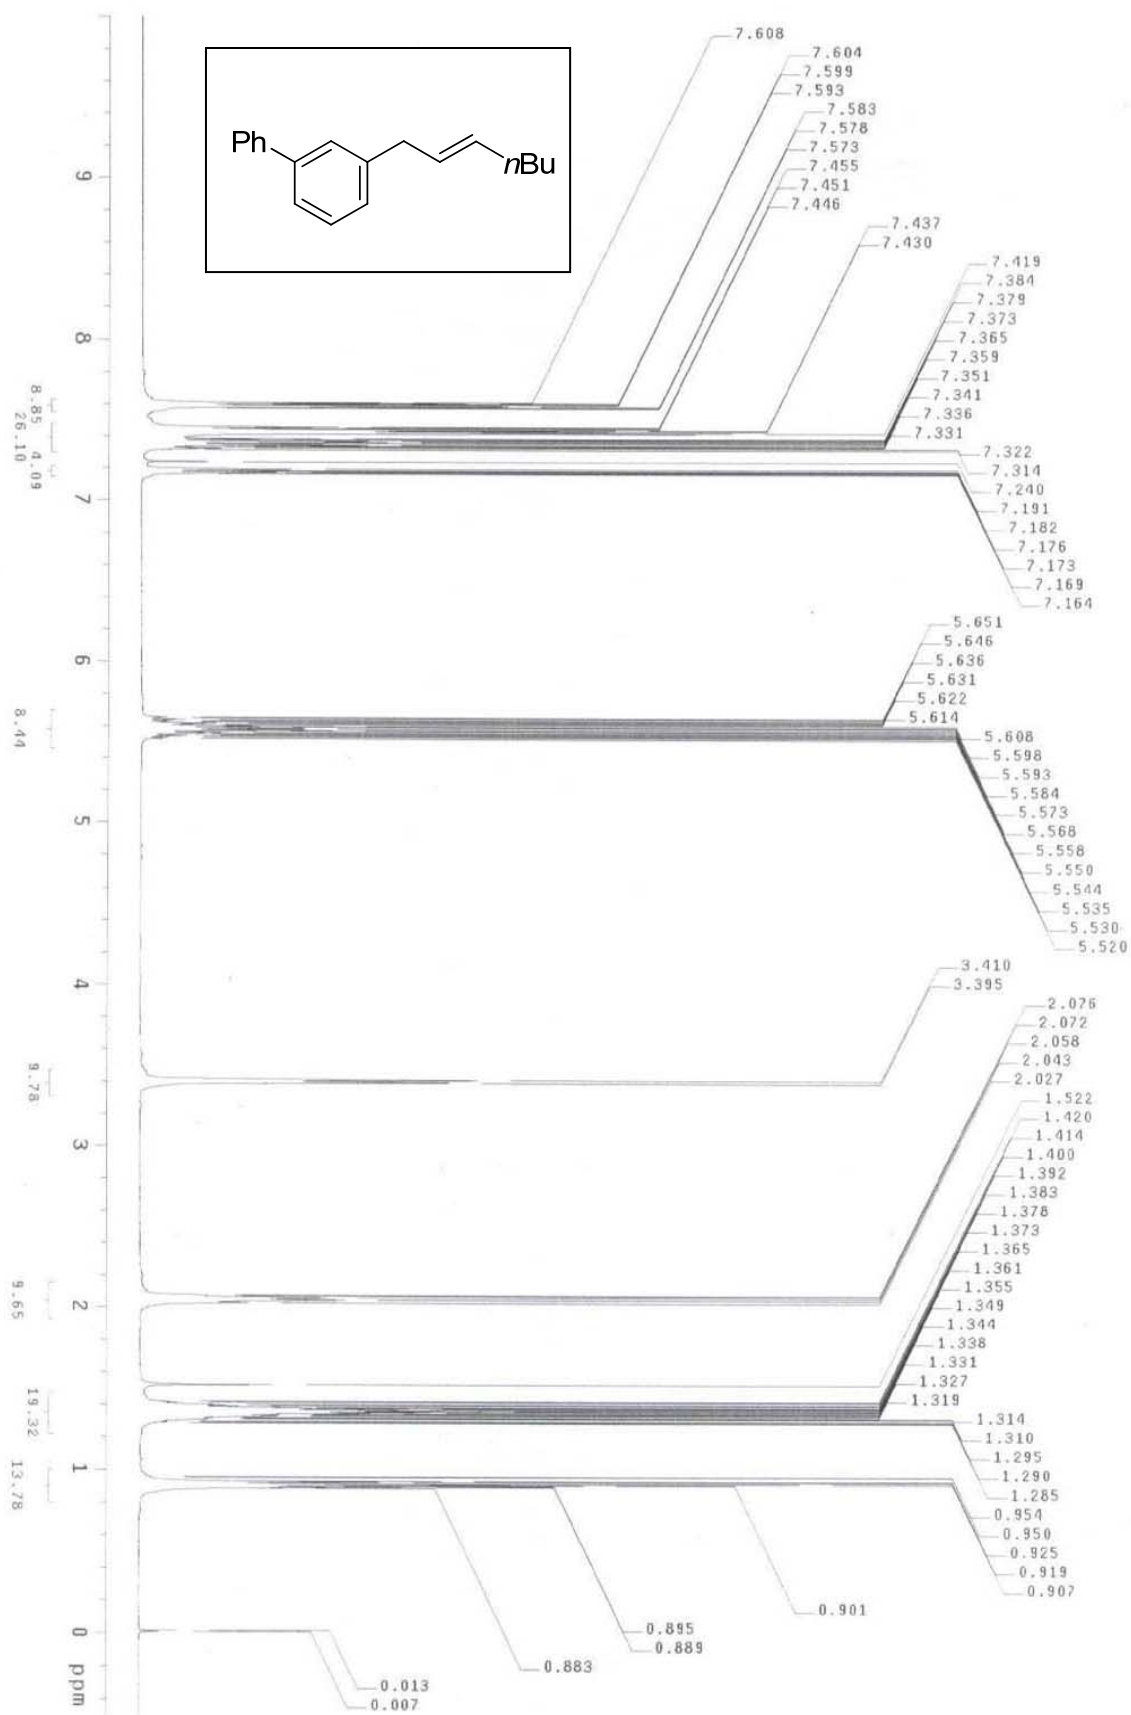

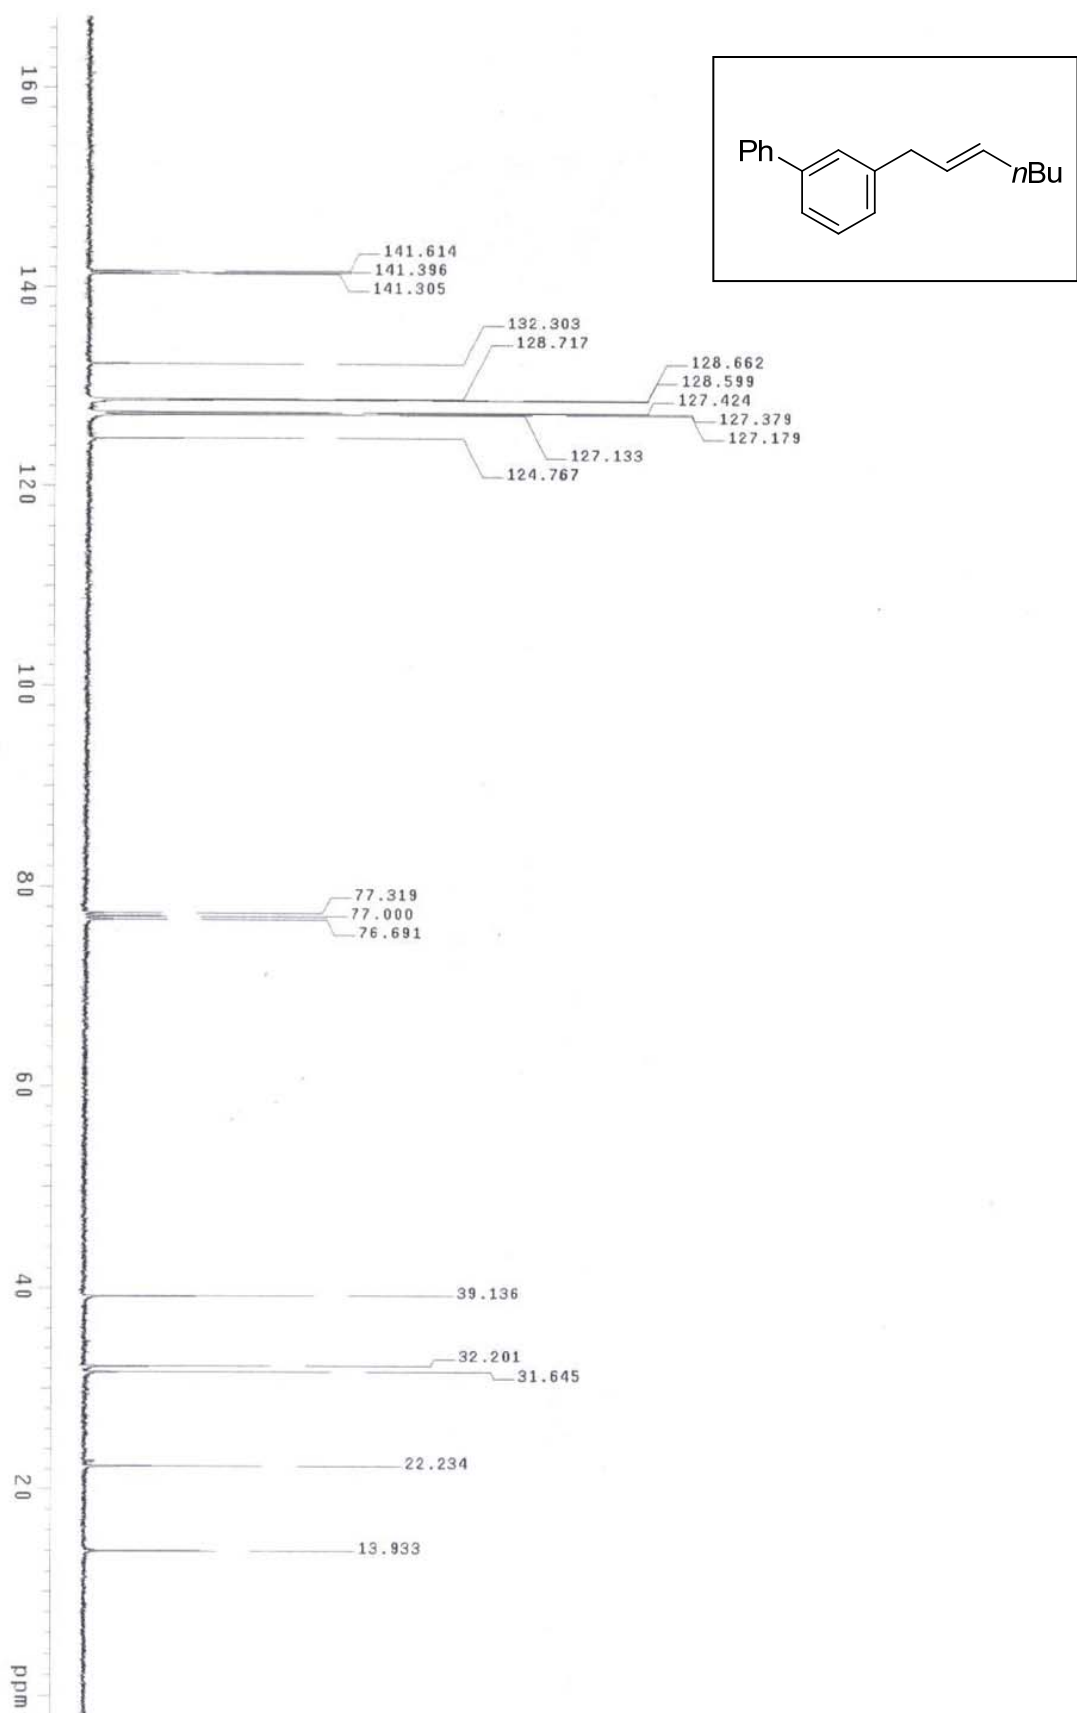

### 11. (*E*)-1-(hept-2-enyl)-3,5-dimethoxybenzene (2k)

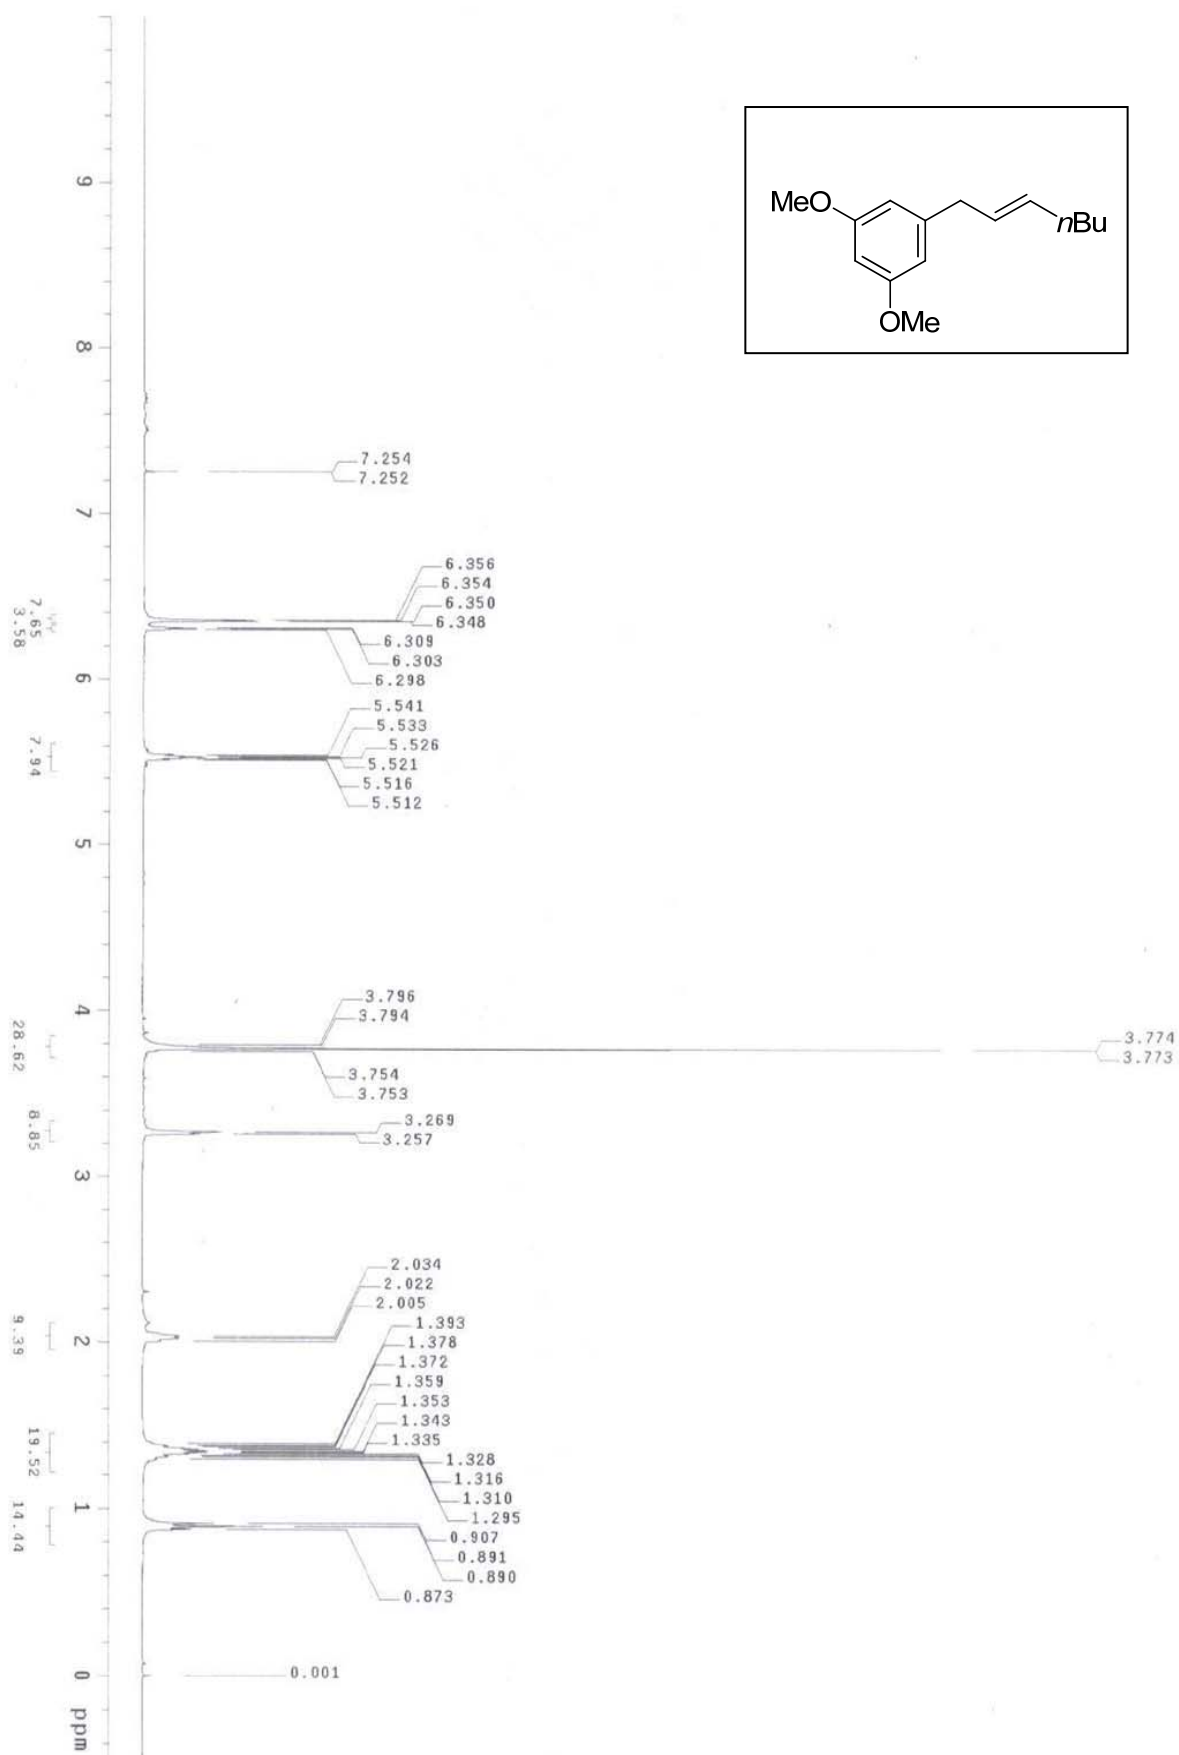

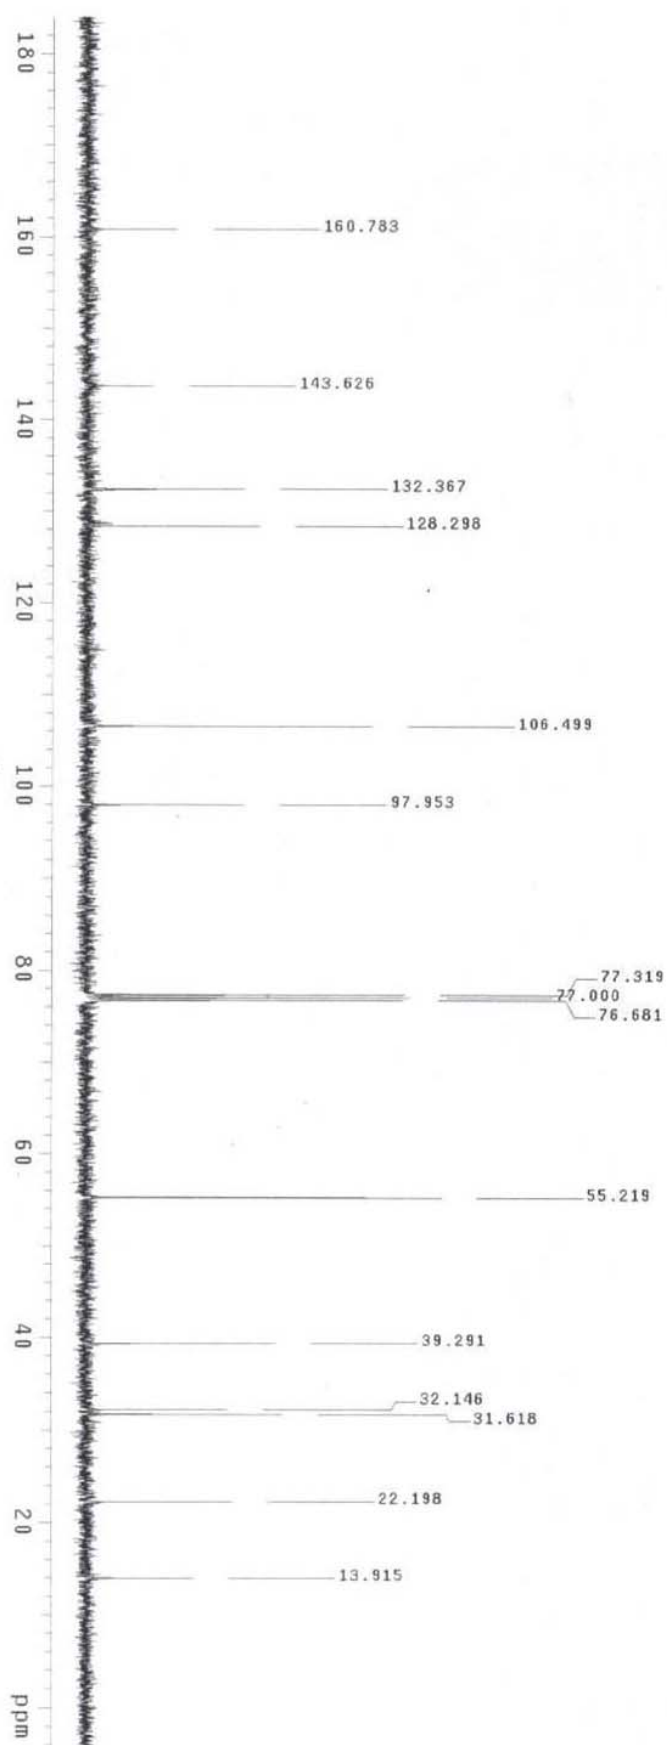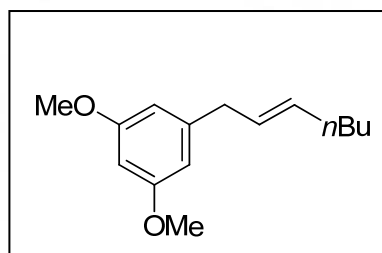



## 12. (E)-1-chloro-4-(hept-2-enyl)benzene (2l)

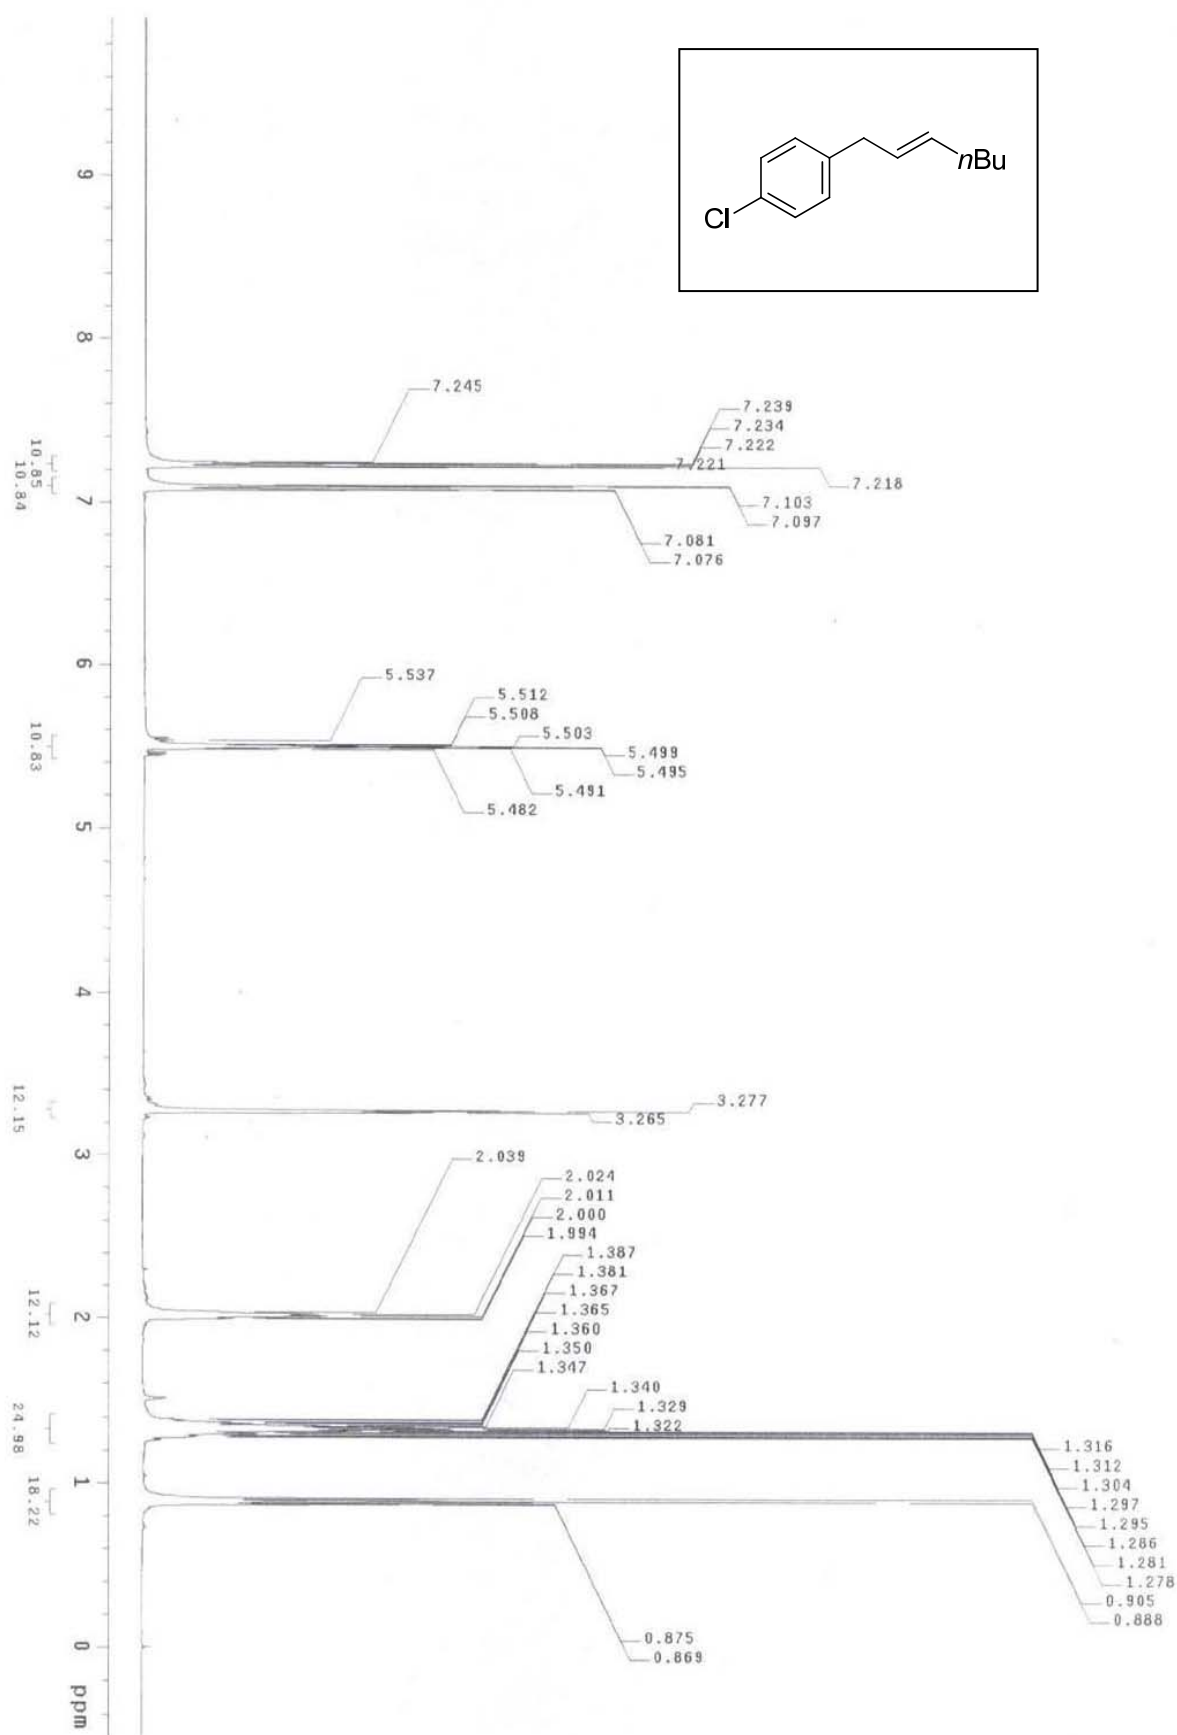

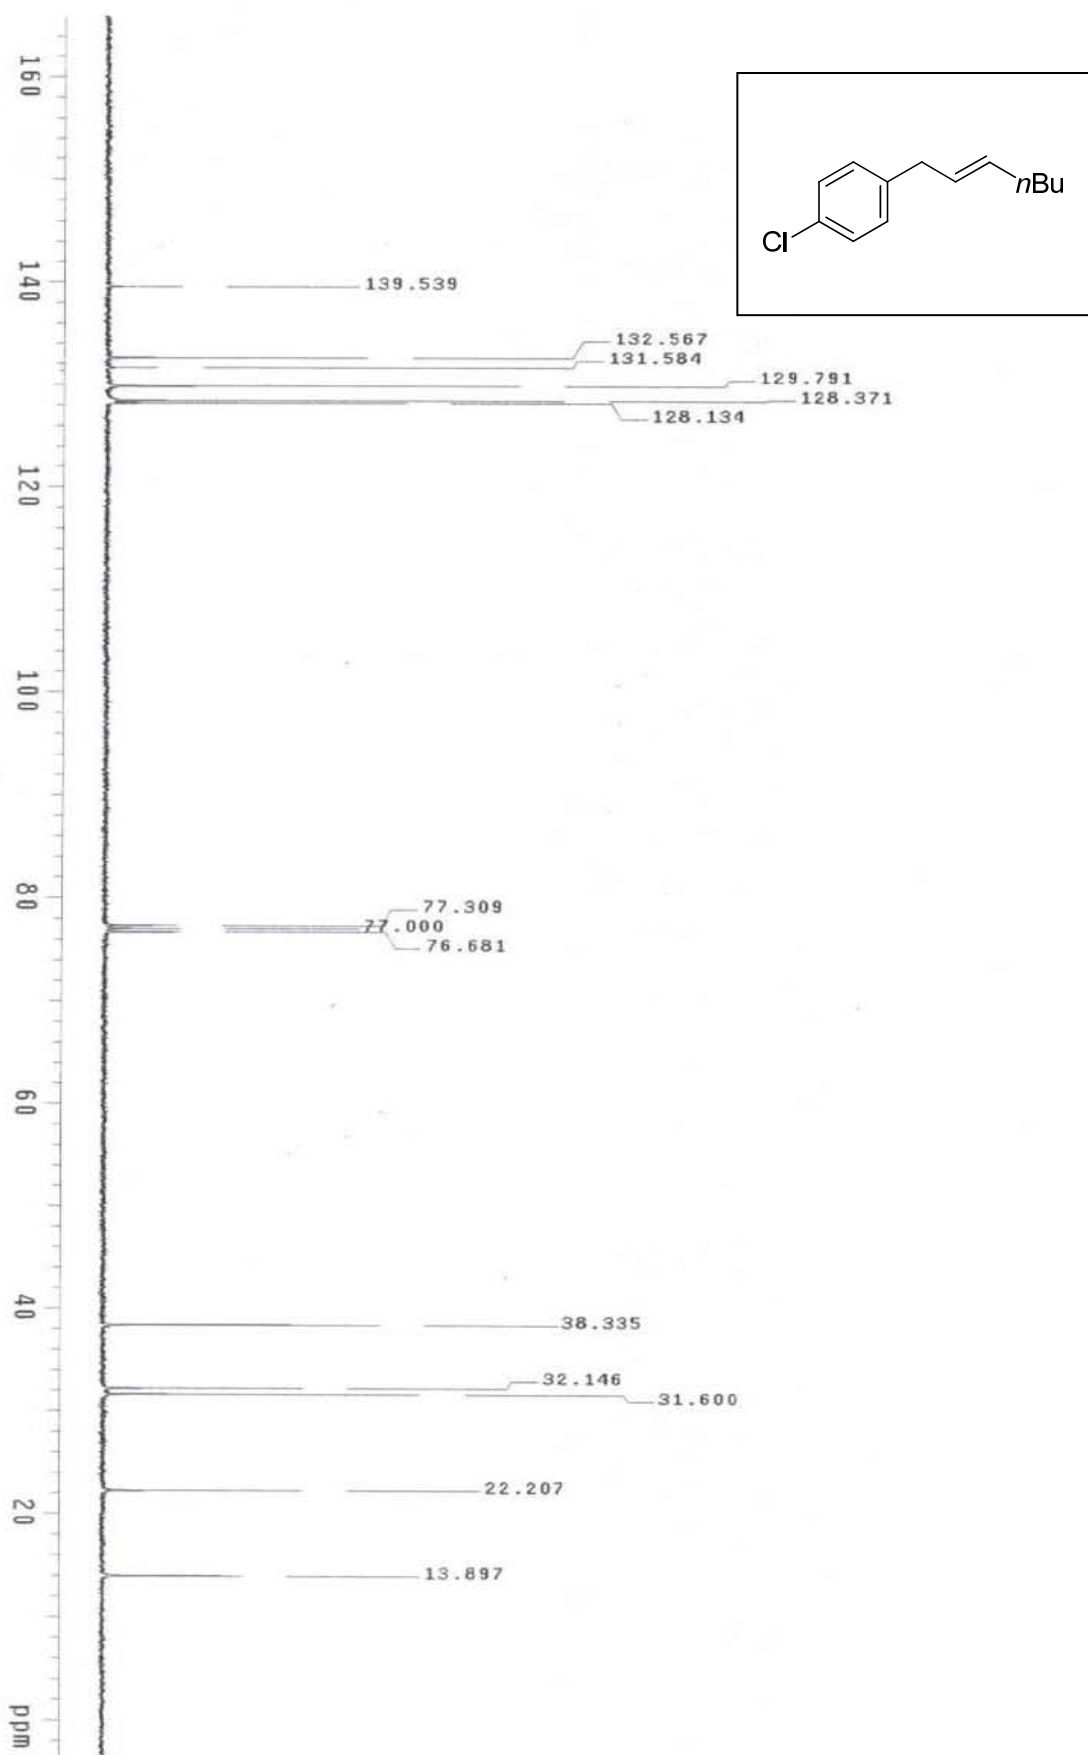

### 13. (*E*)-1-(hept-2-enyl)-3,5-bis(trifluoromethyl)benzene (2m)

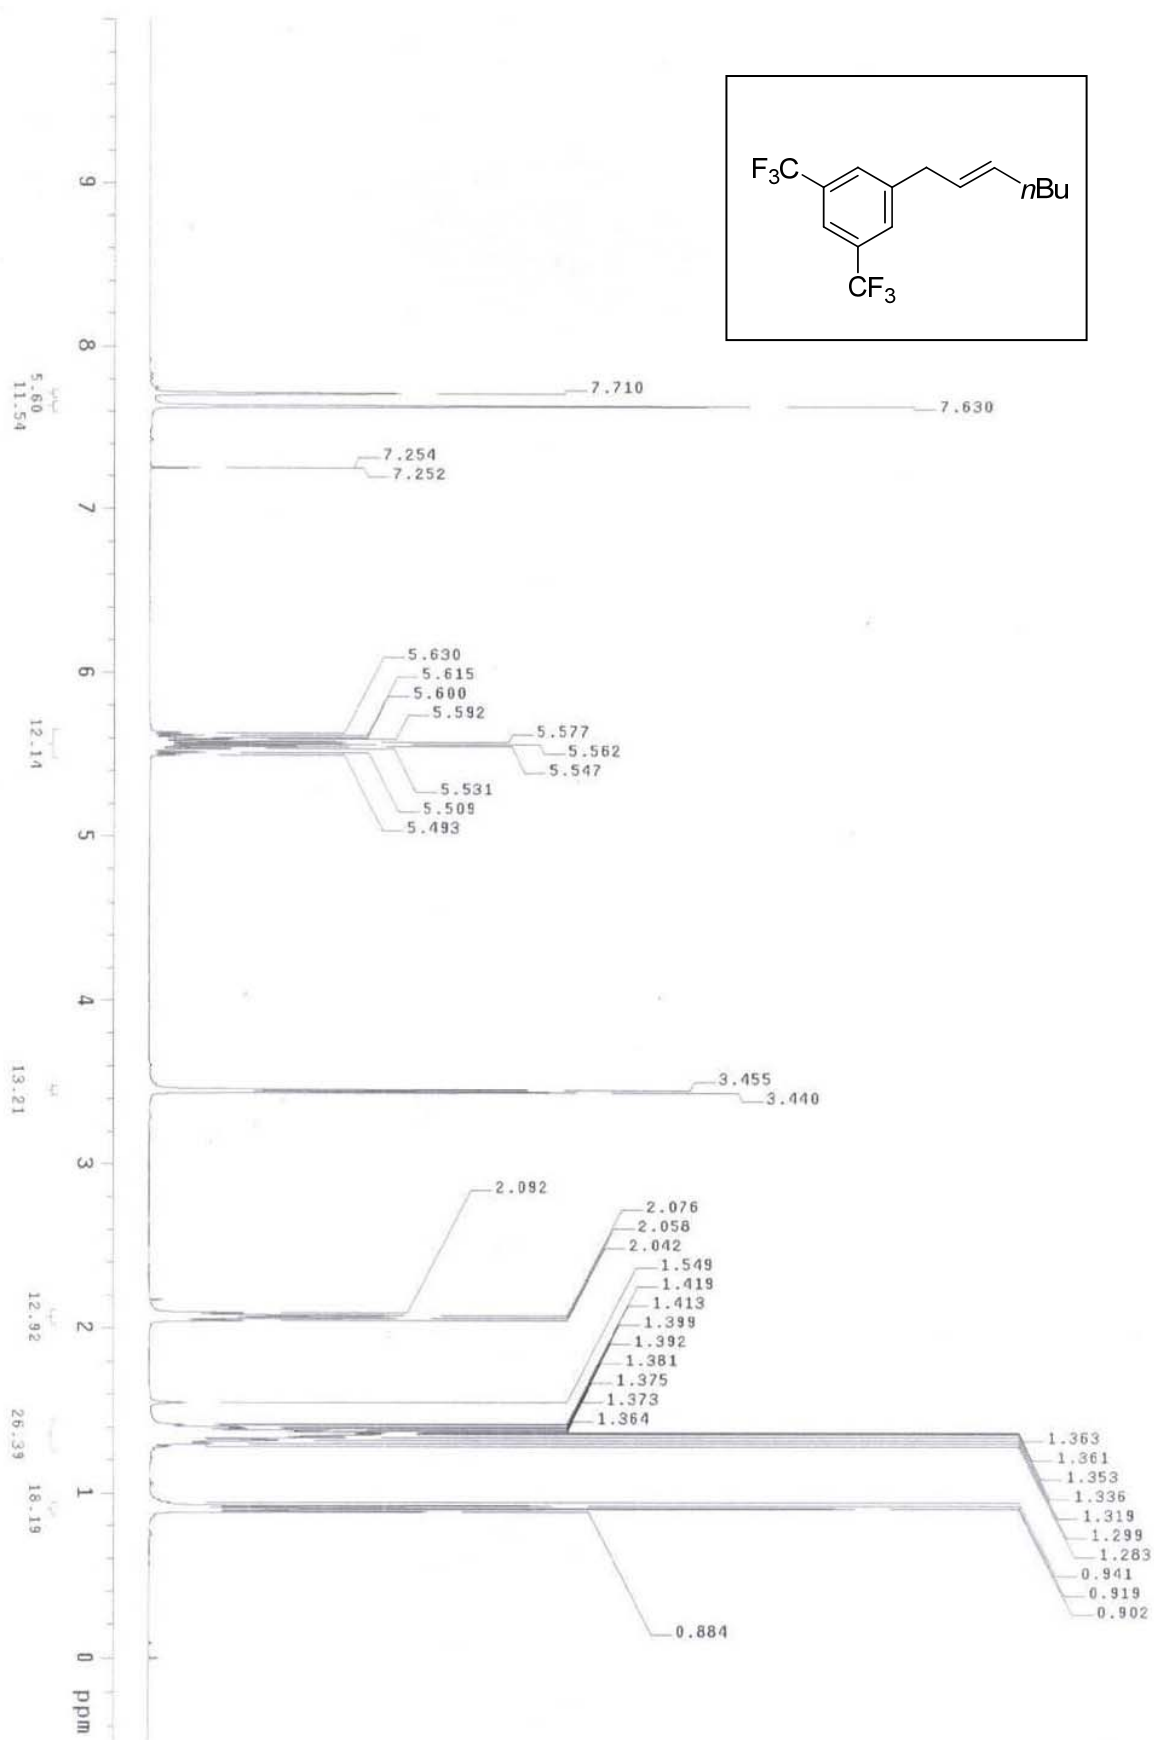

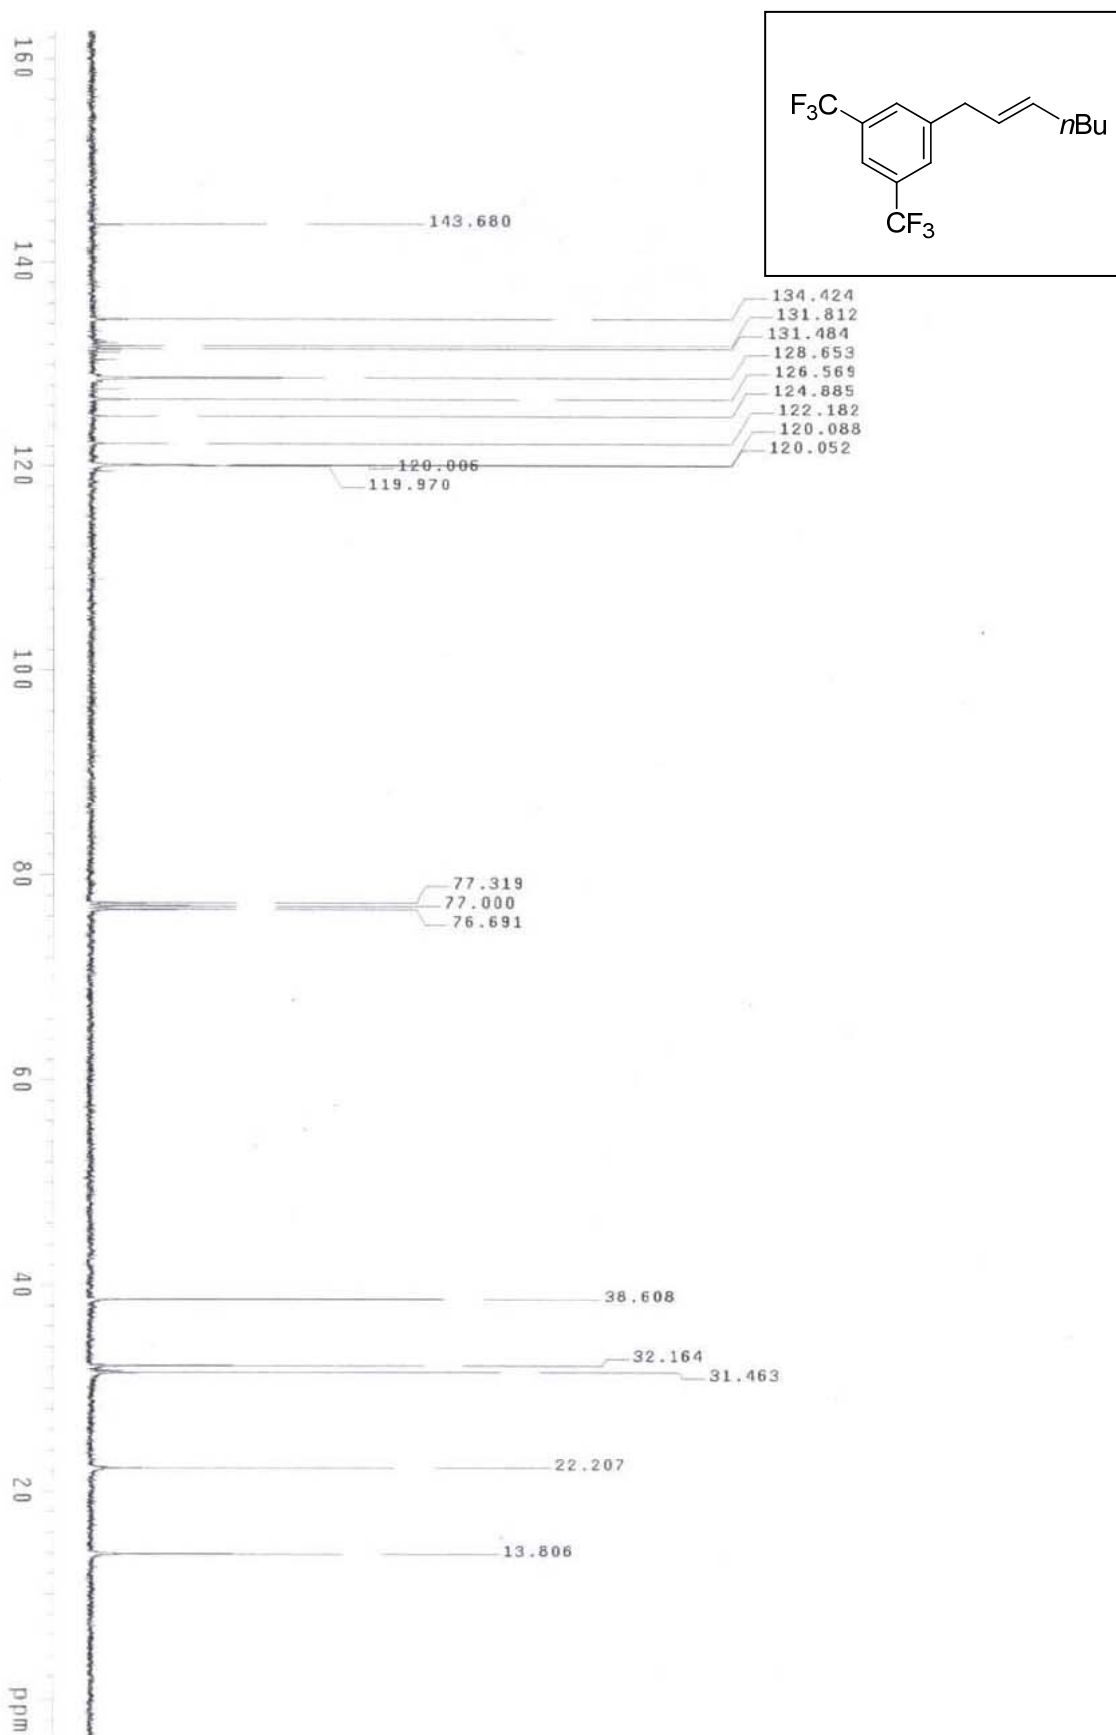

### 14. (*E*)-methyl 4-(hept-2-enyl)benzoate (2n)

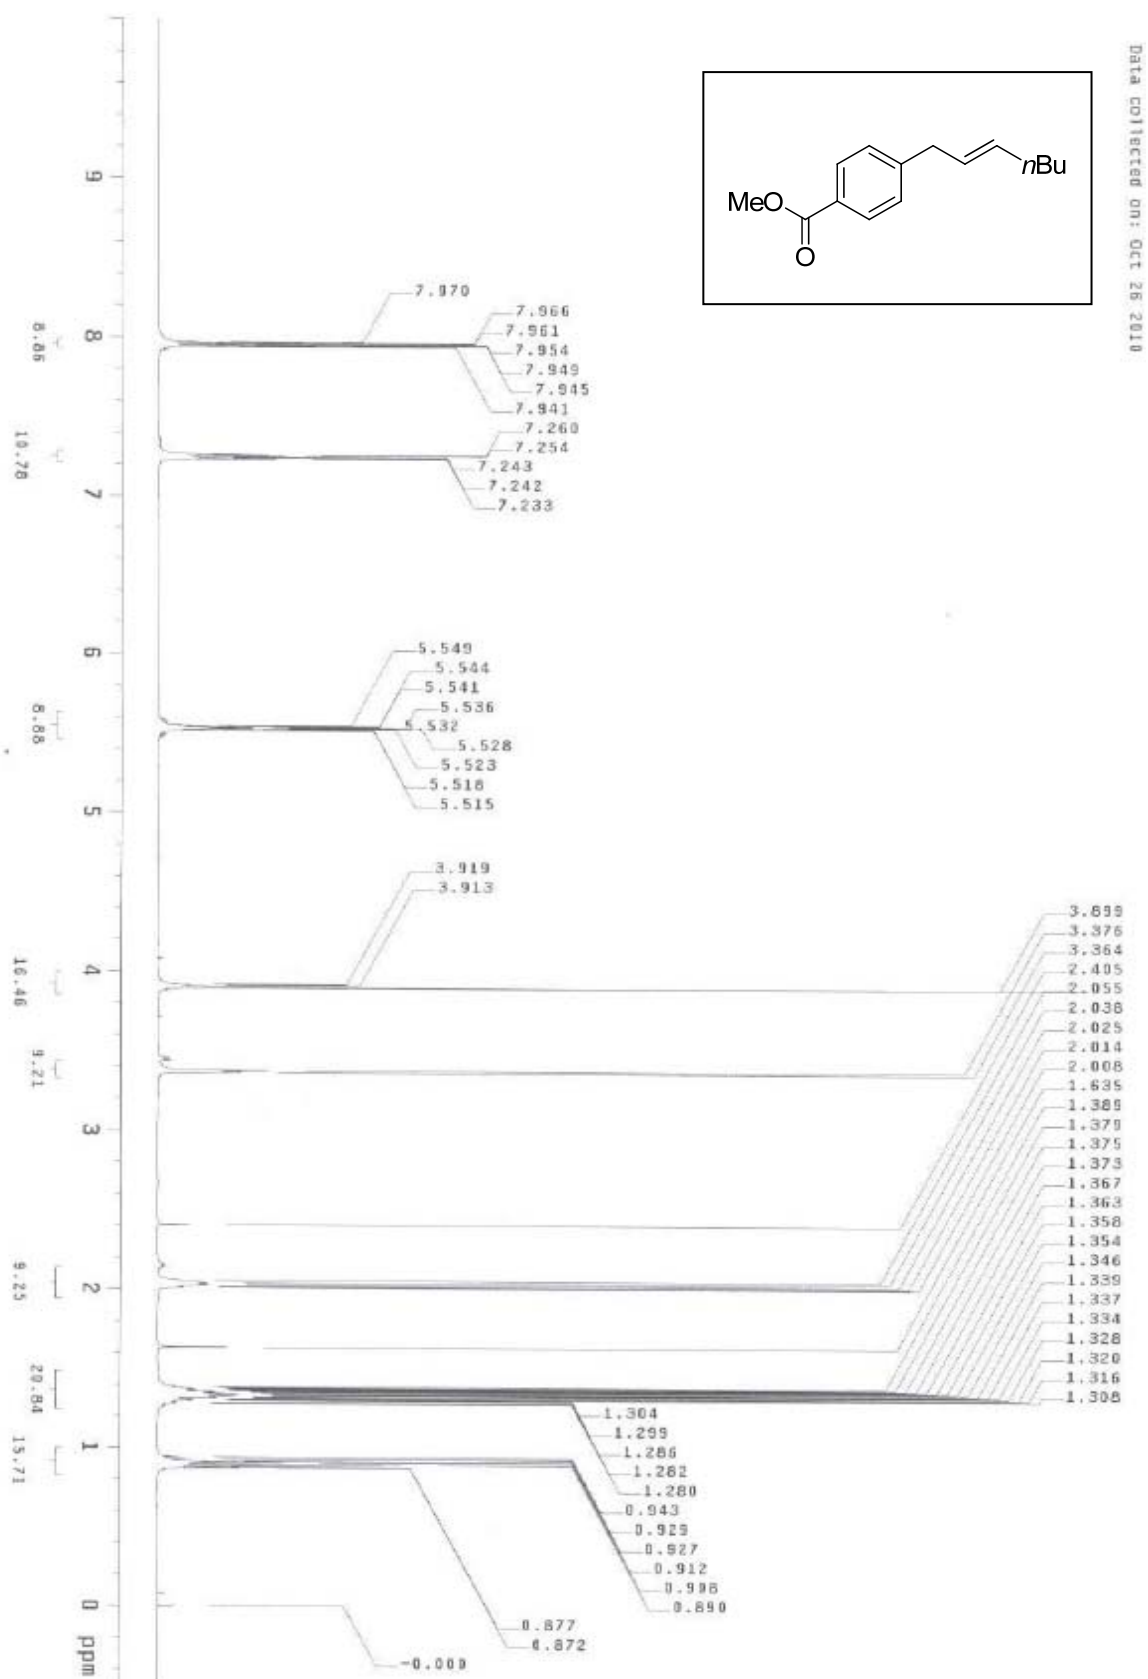

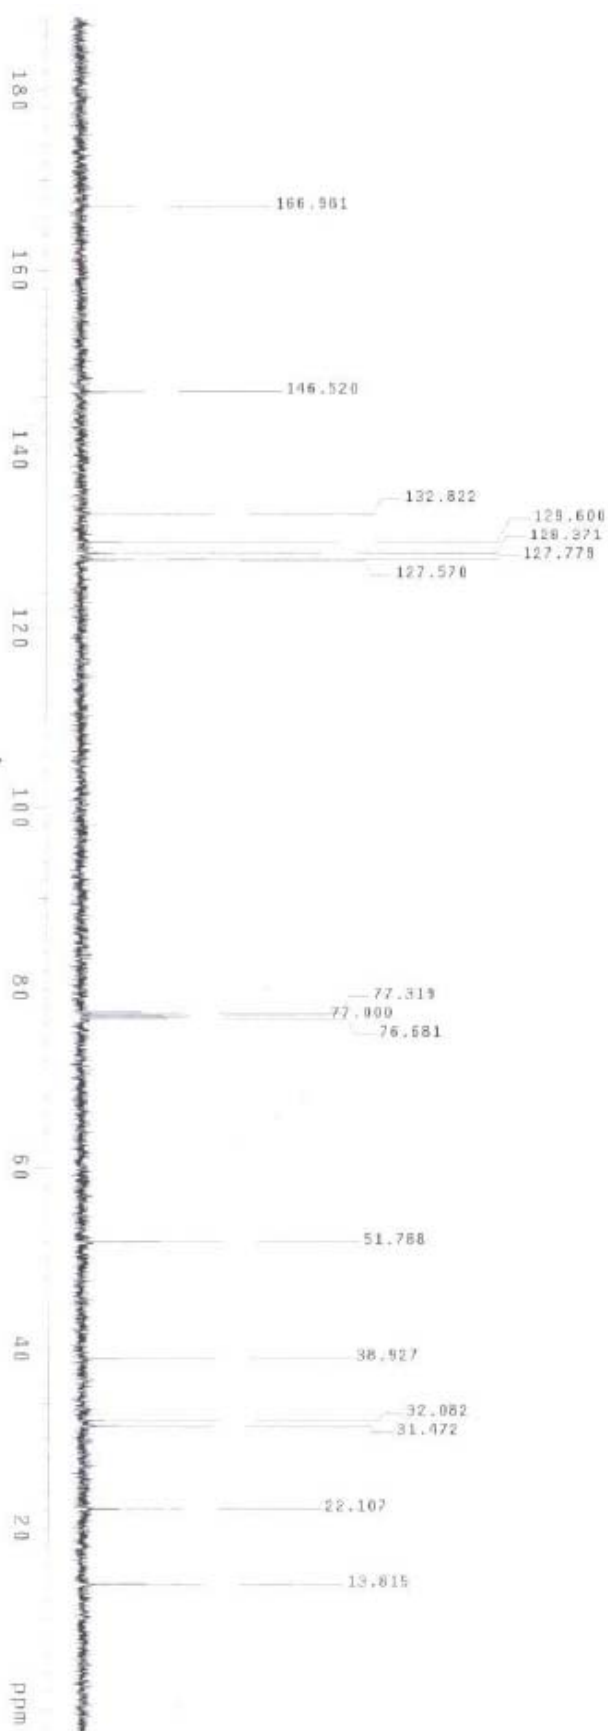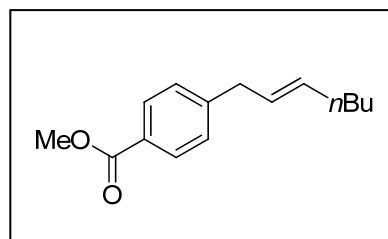

15. (*E*)-1,4-diphenylbut-2-ene (2o)

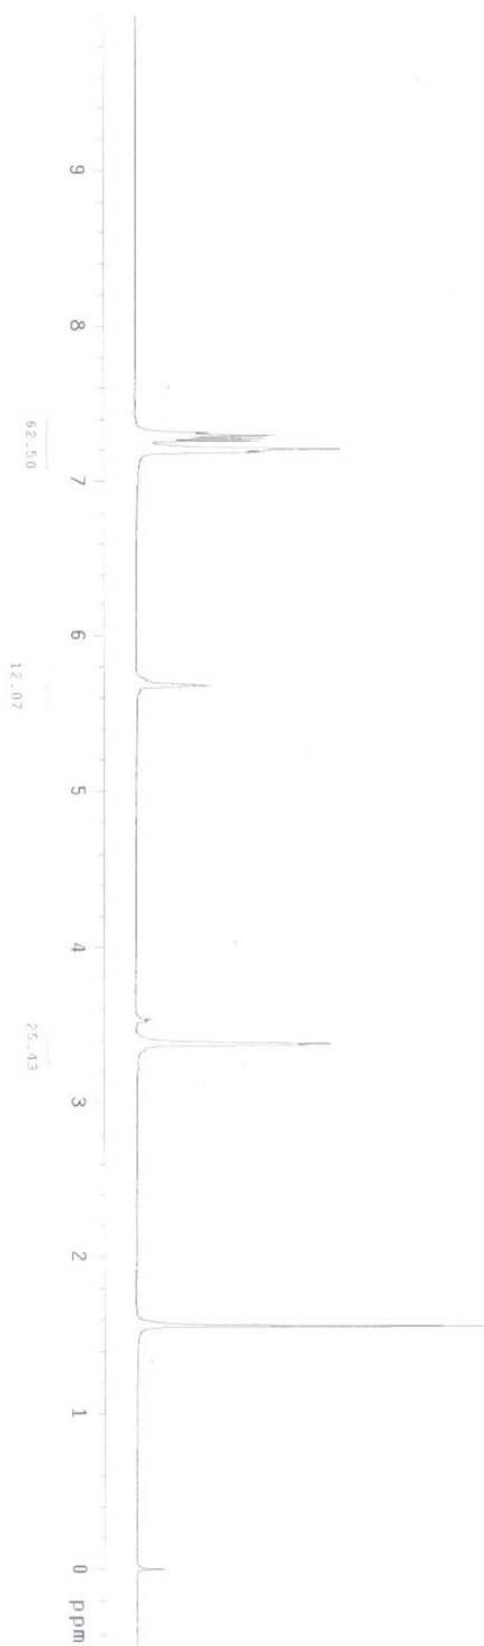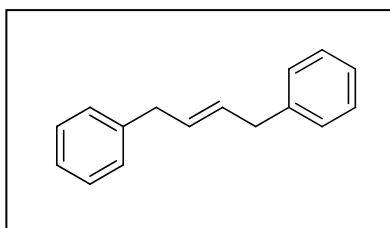

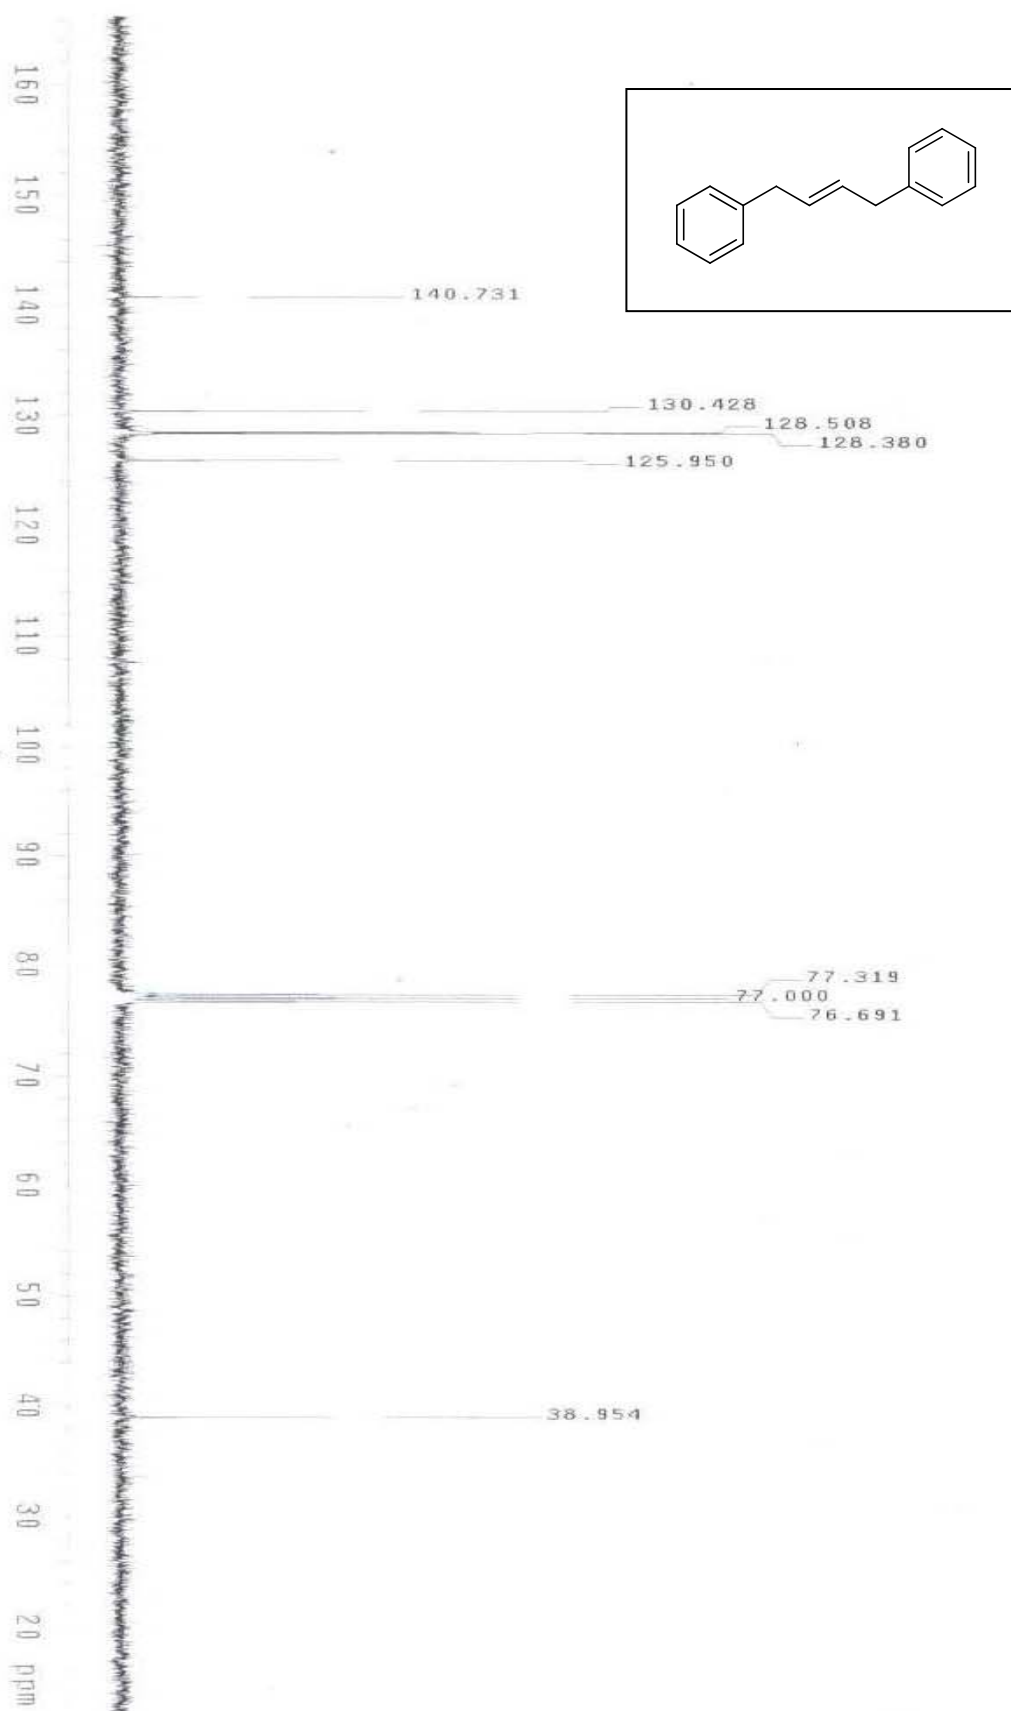



### 16. (E)-(3-cyclohexylallyl)benzene (2p)

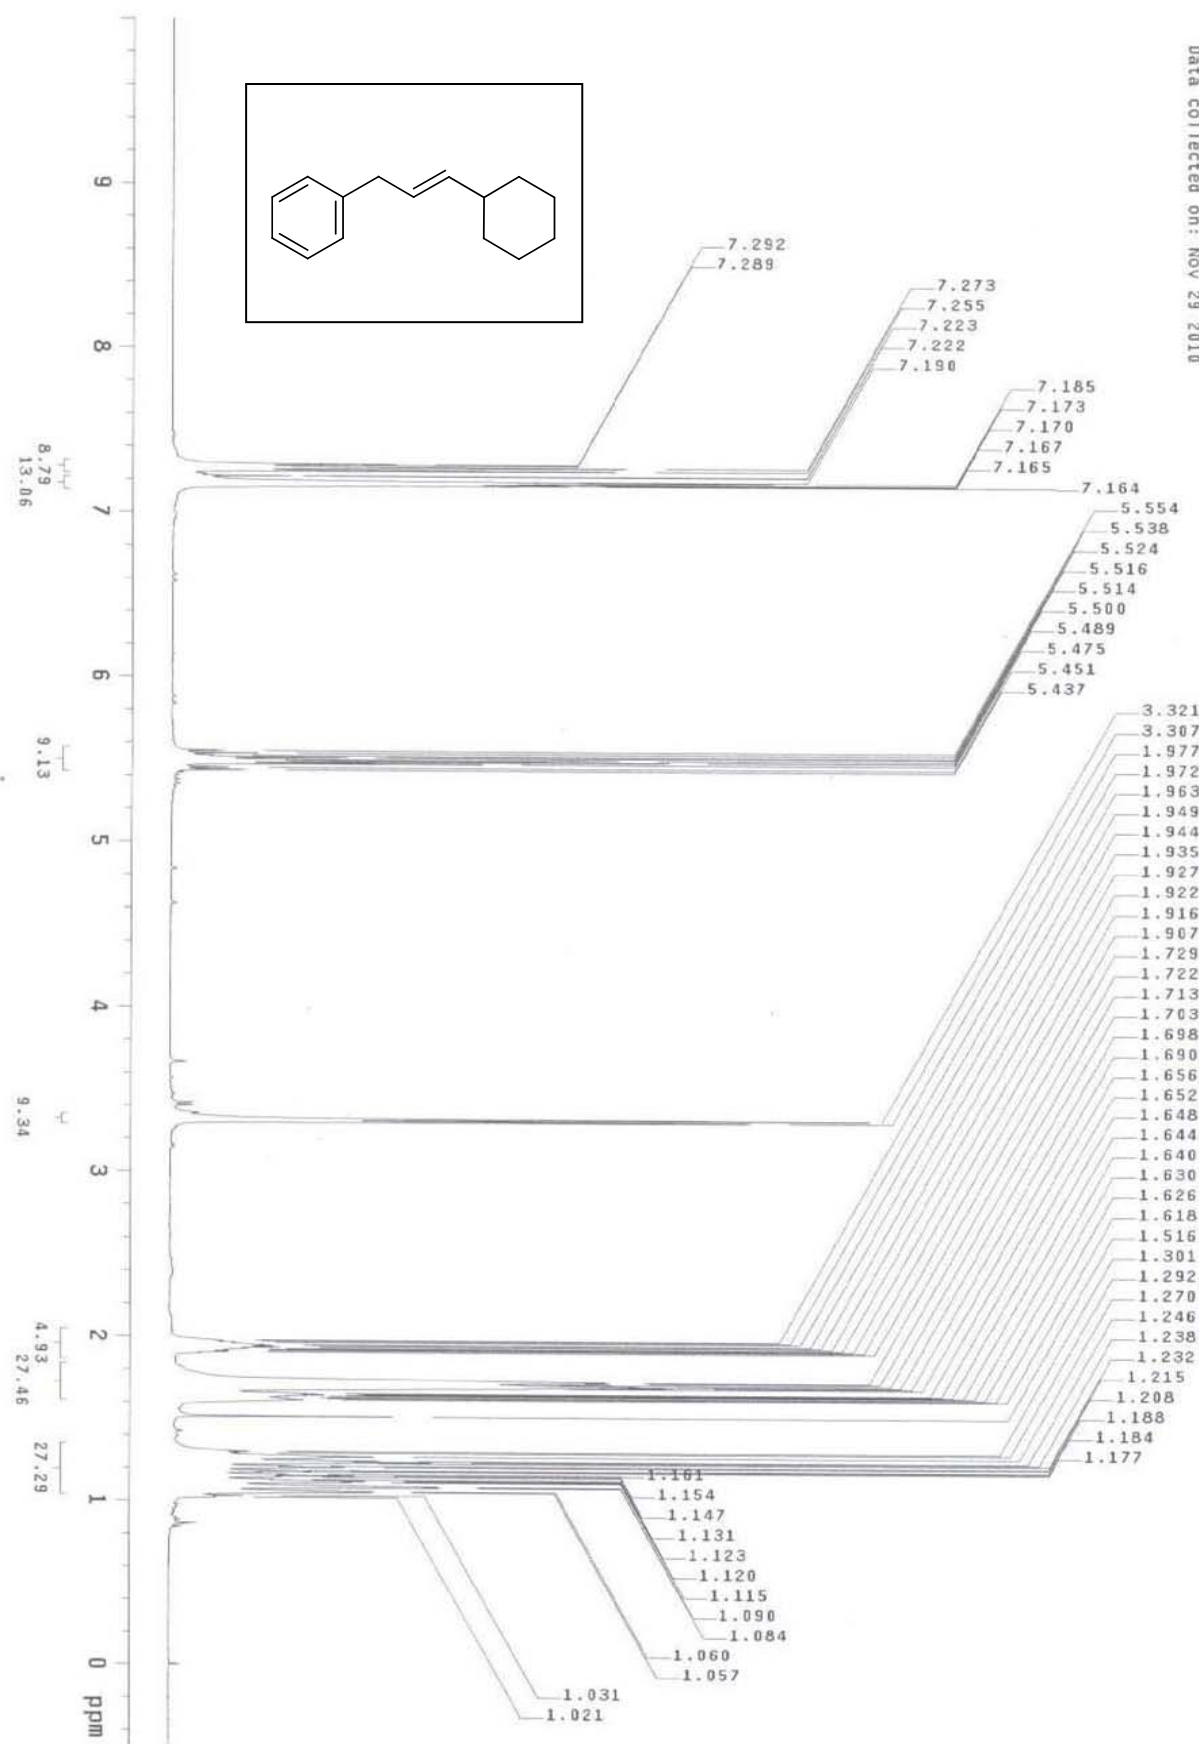

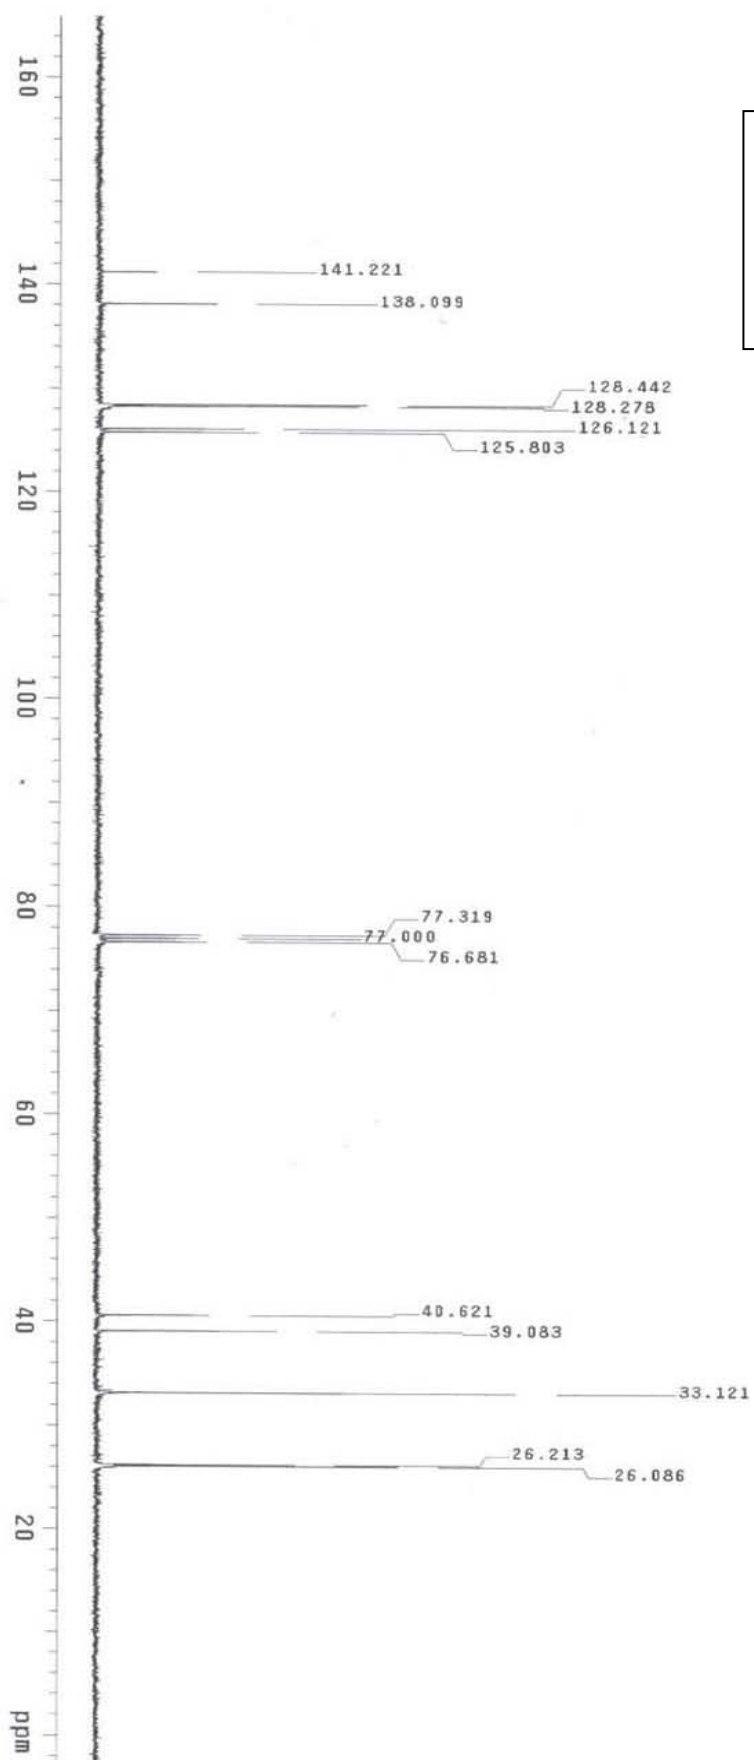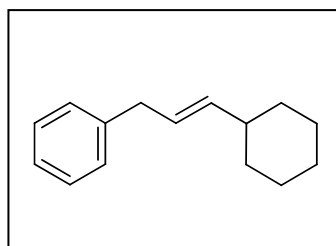

### 17. (E)-3-(3-phenylprop-1-enyl)thiophene (2q)

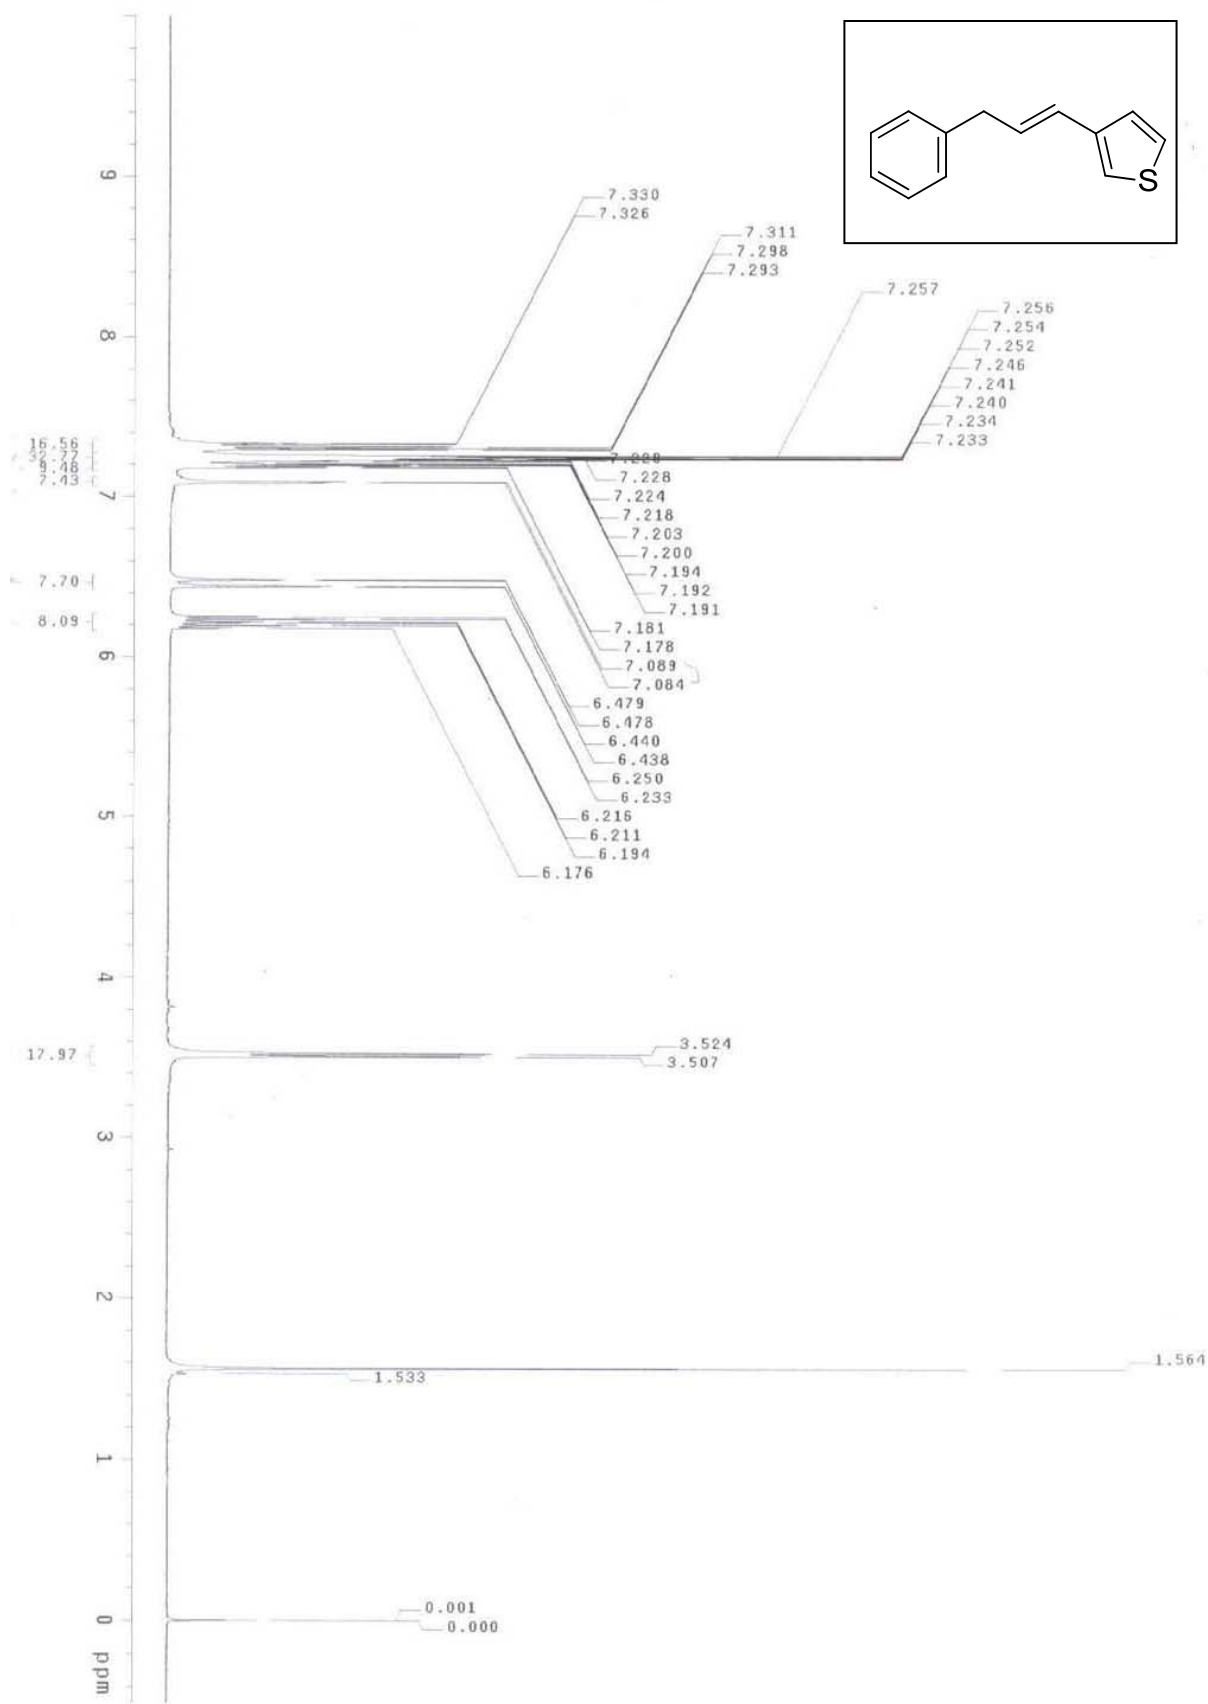

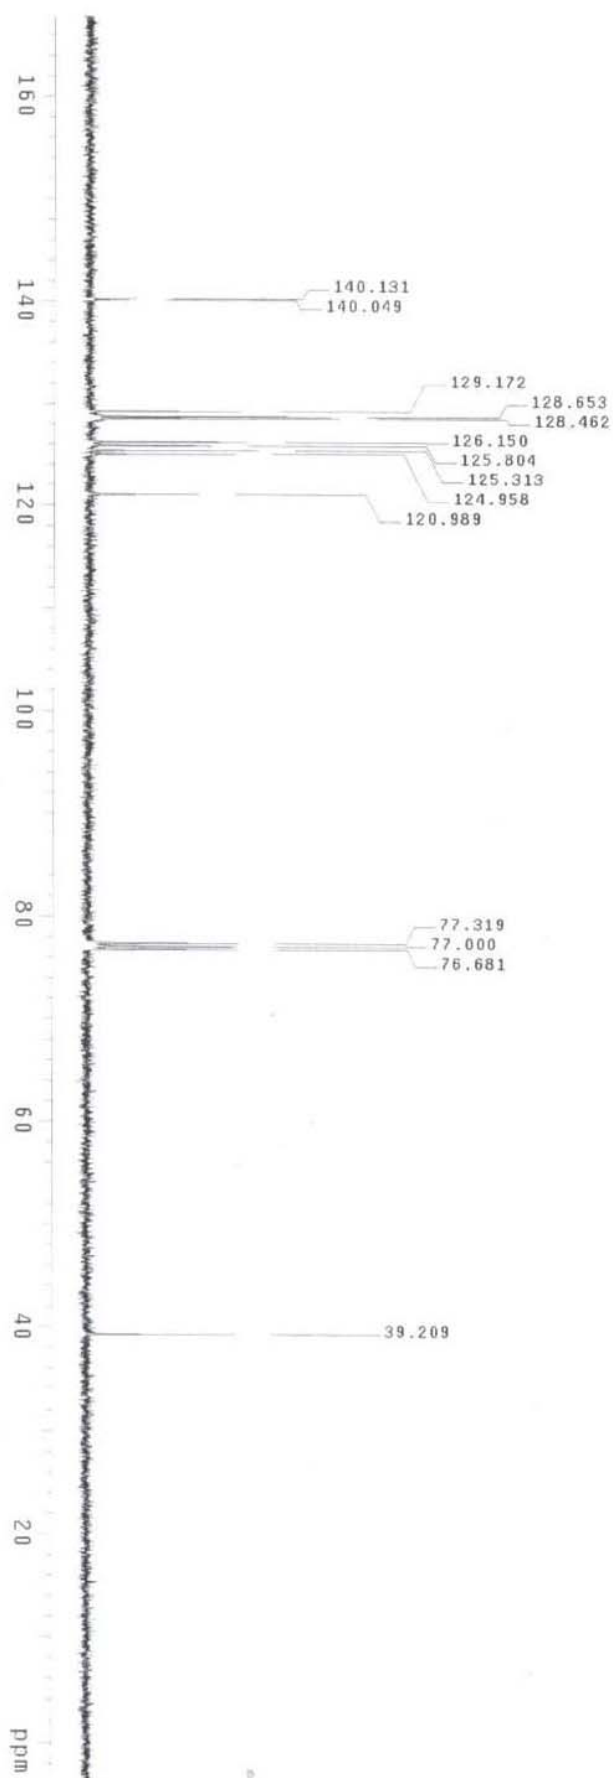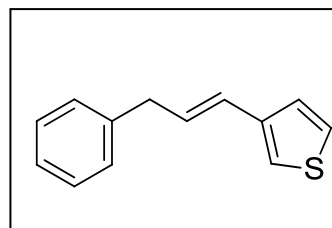

18. (*E*)-1-fluoro-4-(hept-2-enyl)benzene (2r)

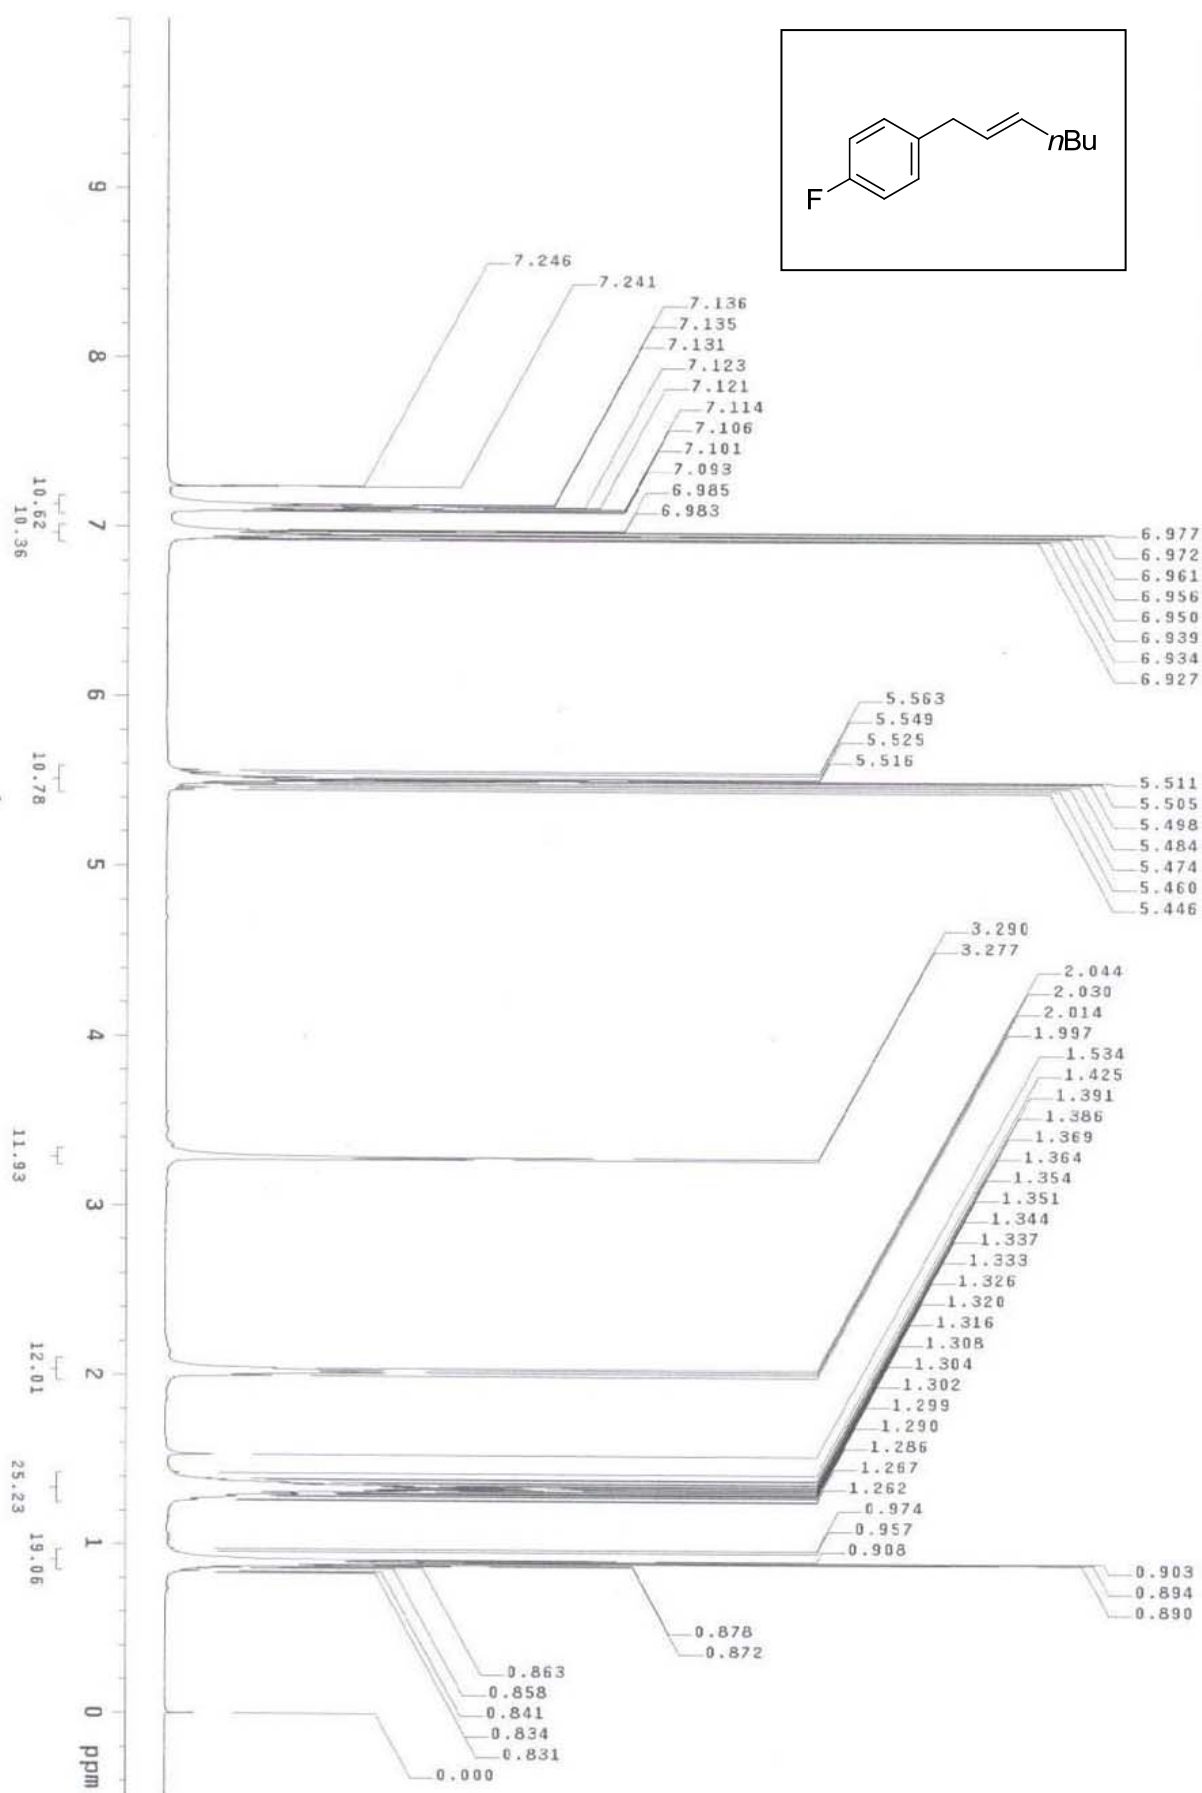

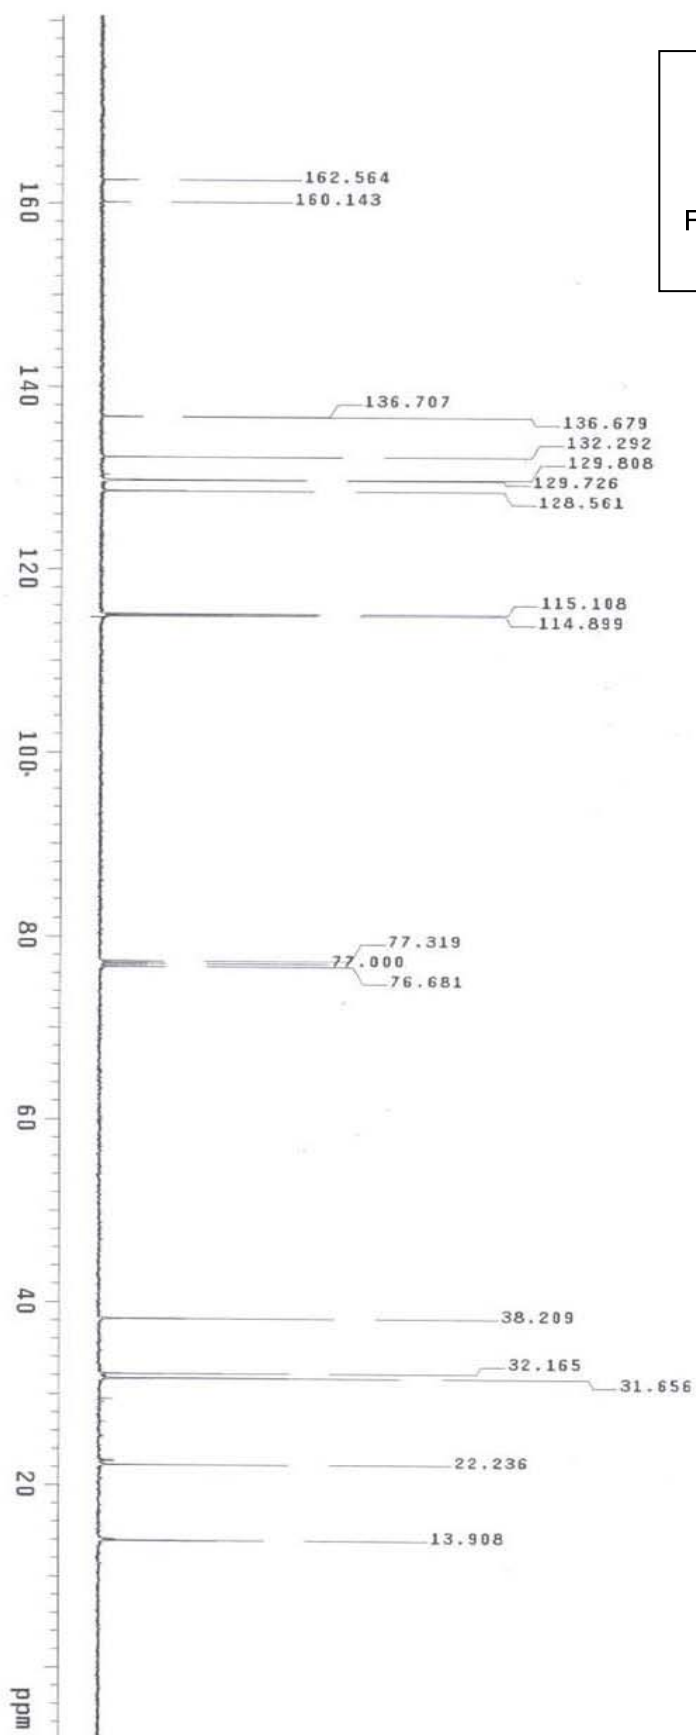

19. (E)-1-(hept-2-enyl)-4-vinylbenzene (2s)

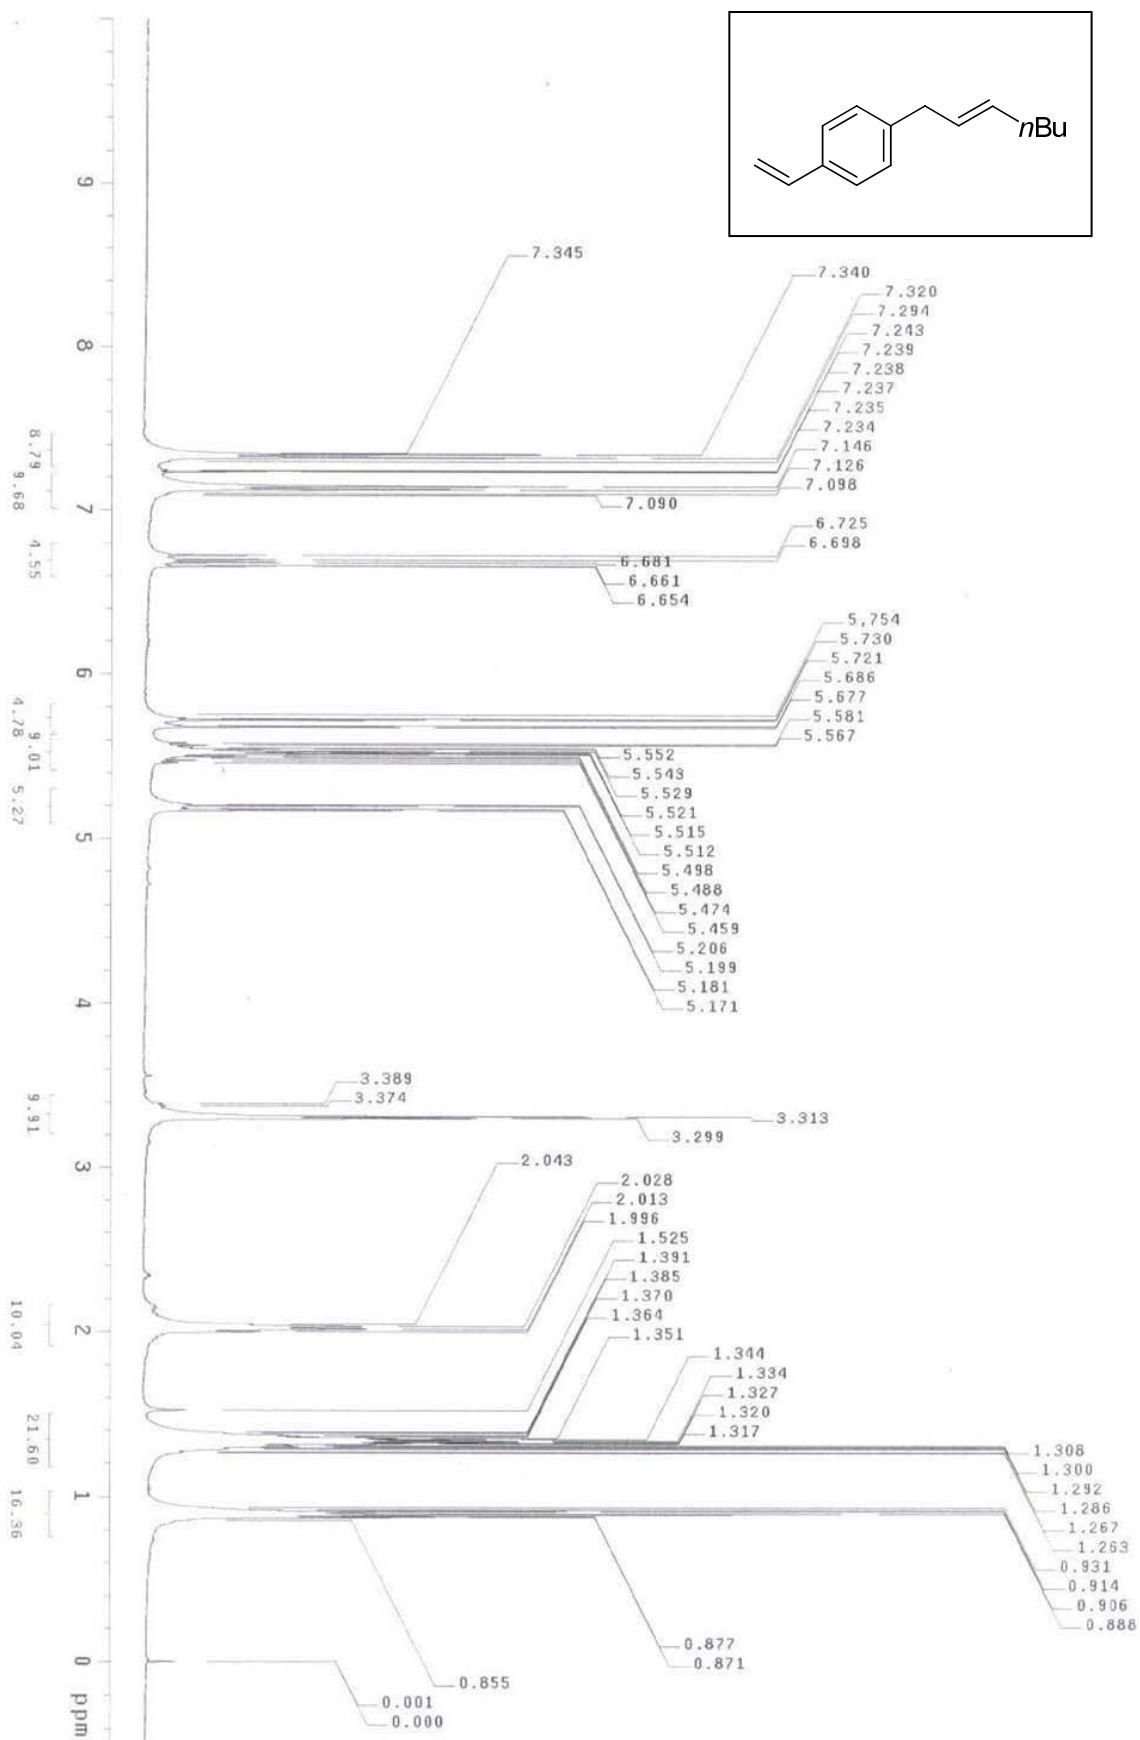

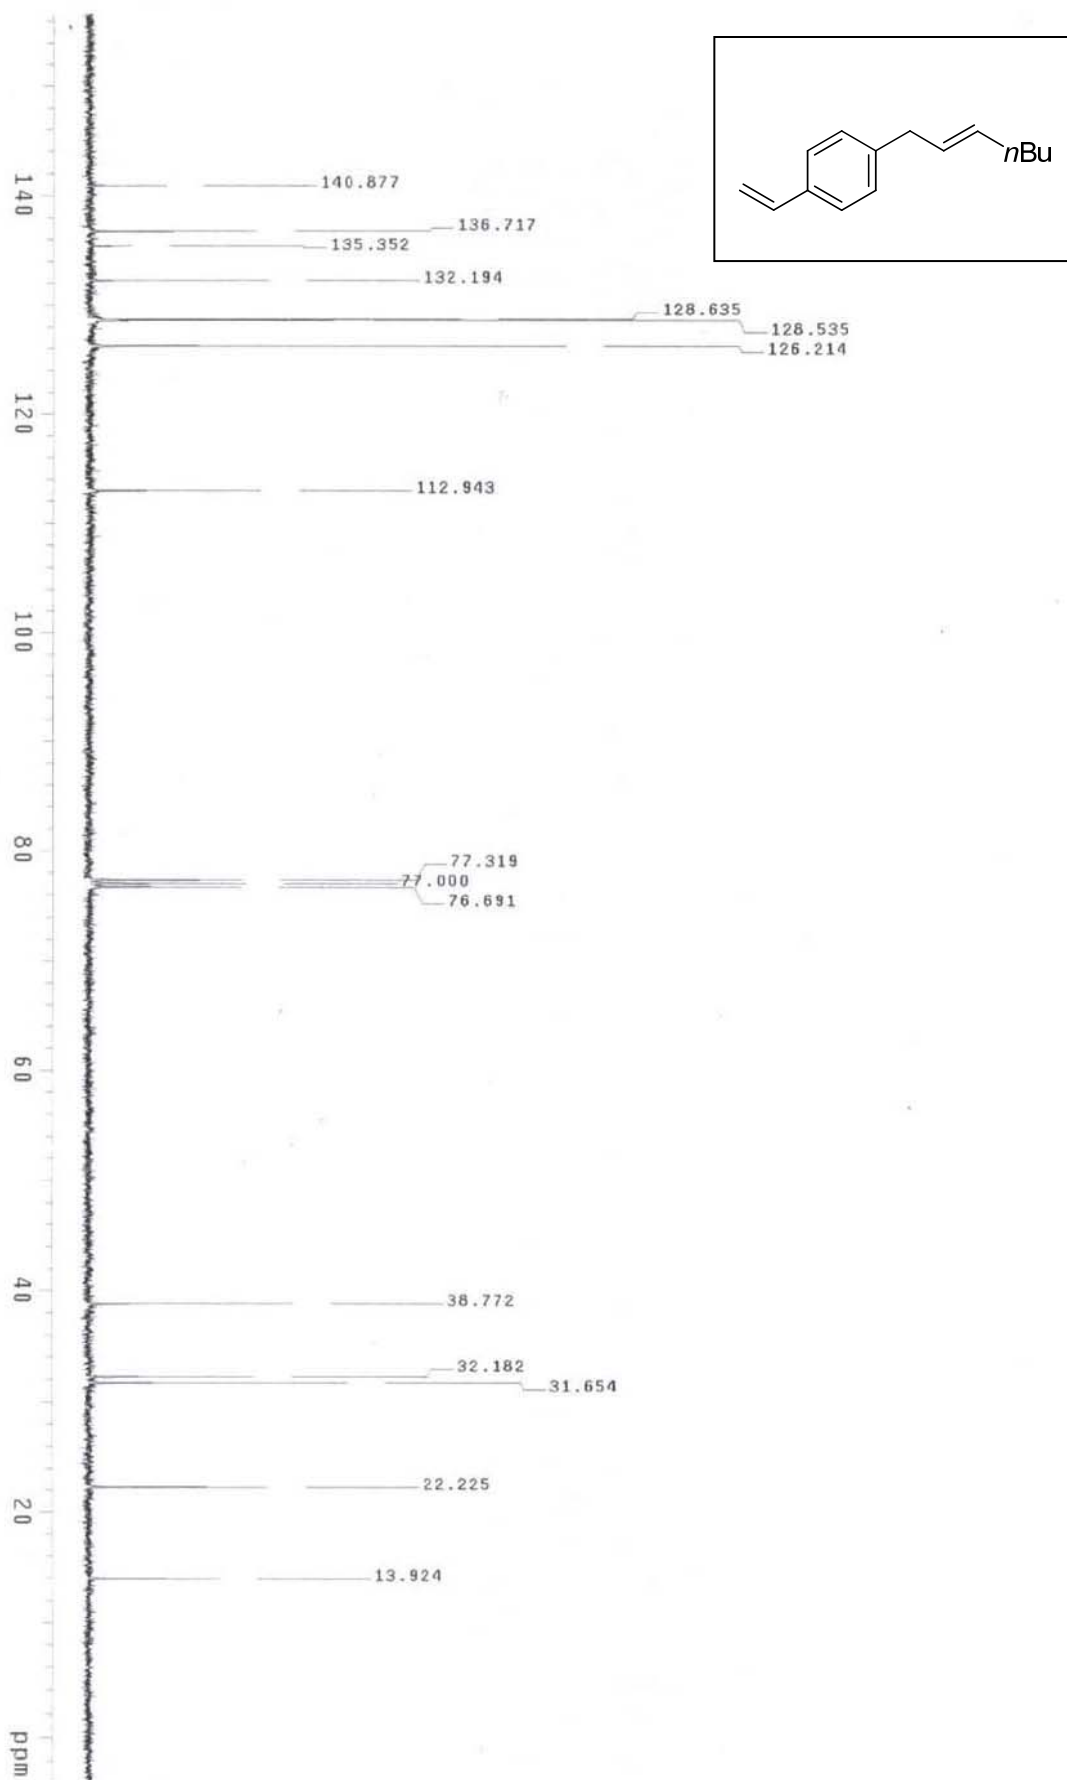

Supplement: c2ob25303h.pdf [file c2ob25303h.pdf]
